# 1 **Gut-derived bacterial flagellin induces beta-cell inflammation and dysfunction**

2 Torsten P.M. Scheithauer\* <sup>1,2</sup>, Hilde Herrema<sup>1</sup>, Hongbing Yu<sup>3</sup>, Guido J. Bakker<sup>1</sup>,  
3 Maaïke Winkelmeijer<sup>1</sup>, Galina Soukhatcheva<sup>4</sup>, Derek Dai<sup>4</sup>, Caixia Ma<sup>3</sup>, Stefan R.  
4 Havik<sup>1</sup>, Manon Balvers<sup>1</sup>, Mark Davids<sup>1</sup>, Abraham S. Meijnikman<sup>1</sup>, Ömrüm Aydin<sup>1</sup>, Bert-  
5 Jan H. van den Born<sup>1,5</sup>, Marc G. Besselink<sup>6</sup>, Olivier R. Busch<sup>6</sup>, Maurits de Brauw<sup>7</sup>,  
6 Arnold van de Laar<sup>7</sup>, Clara Belzer<sup>8</sup>, Martin Stahl<sup>3</sup>, Willem M. de Vos<sup>8, 9</sup>, Bruce A.  
7 Vallance<sup>3</sup>, Max Nieuwdorp<sup>1,2</sup>, C. Bruce Verchere<sup>4</sup>, Daniël H. van Raalte<sup>1,2</sup>

8

## 9 *Affiliations*

10 1 Department of (Experimental) Vascular Medicine, Amsterdam UMC, University of Amsterdam  
11 Amsterdam, 1105 AZ, The Netherlands

12 2 Diabetes Center, Department of Internal Medicine, Amsterdam UMC, Vrije Universiteit, Amsterdam,  
13 1081 HV, The Netherlands

14 3 Department of Pediatrics, Division of Gastroenterology, Hepatology and Nutrition, and BC Children's  
15 Hospital Research Institute, Vancouver, British Columbia, V6H 3N1, Canada

16 4 Departments of Surgery and Pathology and Laboratory Medicine Pathology and Laboratory Medicine,  
17 BC Children's Hospital Research Institute, Centre for Molecular Medicine & Therapeutics, Vancouver,  
18 British Columbia V5Z 4H4, Canada

19 5 Department of Public and Occupational Health, Amsterdam UMC, University of Amsterdam,  
20 Amsterdam

21 6 Department of Surgery, Amsterdam UMC, University of Amsterdam, Cancer Center Amsterdam, the  
22 Netherlands

23 7 Department of Surgery, Spaarne Gasthuis, Hoofddorp, 2134 TM, The Netherlands

24 8 Laboratory of Microbiology, Wageningen University and Research, 6708 WE, Wageningen, The  
25 Netherlands.

26 9 Human Microbiome Research Program, Faculty of Medicine, University of Helsinki, FI-00014, Helsinki,  
27 Finland

28

29 Correspondence: Torsten P.M. Scheithauer, Department of (Experimental) Vascular Medicine,  
30 Amsterdam UMC, Amsterdam, 1105 AZ, The Netherlands, [t.p.scheithauer@amsterdamumc.nl](mailto:t.p.scheithauer@amsterdamumc.nl)

31 **Abstract**

32

33 **Objective:** Hyperglycemia and type 2 diabetes (T2D) are caused by failure of  
34 pancreatic beta cells. The role of the gut microbiota in T2D has been studied but  
35 causal links remain enigmatic.

36 **Design:** Obese individuals with or without T2D were included from two independent  
37 Dutch cohorts. Human data was translated *in vitro* and *in vivo* by using pancreatic  
38 islets from C57BL6/J mice and by injecting flagellin into obese mice.

39 **Results:** Flagellin is part of the bacterial locomotor appendage flagellum, present on  
40 gut bacteria including Enterobacteriaceae, which we show to be more abundant in  
41 the gut of individuals with T2D. Subsequently, flagellin induces a pro-inflammatory  
42 response in pancreatic islets mediated by the Toll-like receptor (TLR)-5 expressed on  
43 resident islet macrophages. This inflammatory response associated with beta-cell  
44 dysfunction, characterized by reduced insulin gene expression, impaired proinsulin  
45 processing and stress-induced insulin hypersecretion *in vitro* and *in vivo* in mice.

46 **Conclusion:** We postulate that increased systemically disseminated flagellin in T2D  
47 is a contributing factor to beta cell failure in time and represents a novel therapeutic  
48 target.

49

50 *Keywords*

51 Gut microbiota, type 2 diabetes, inflammation, beta-cell function, flagellin

52 **Graphical abstract**

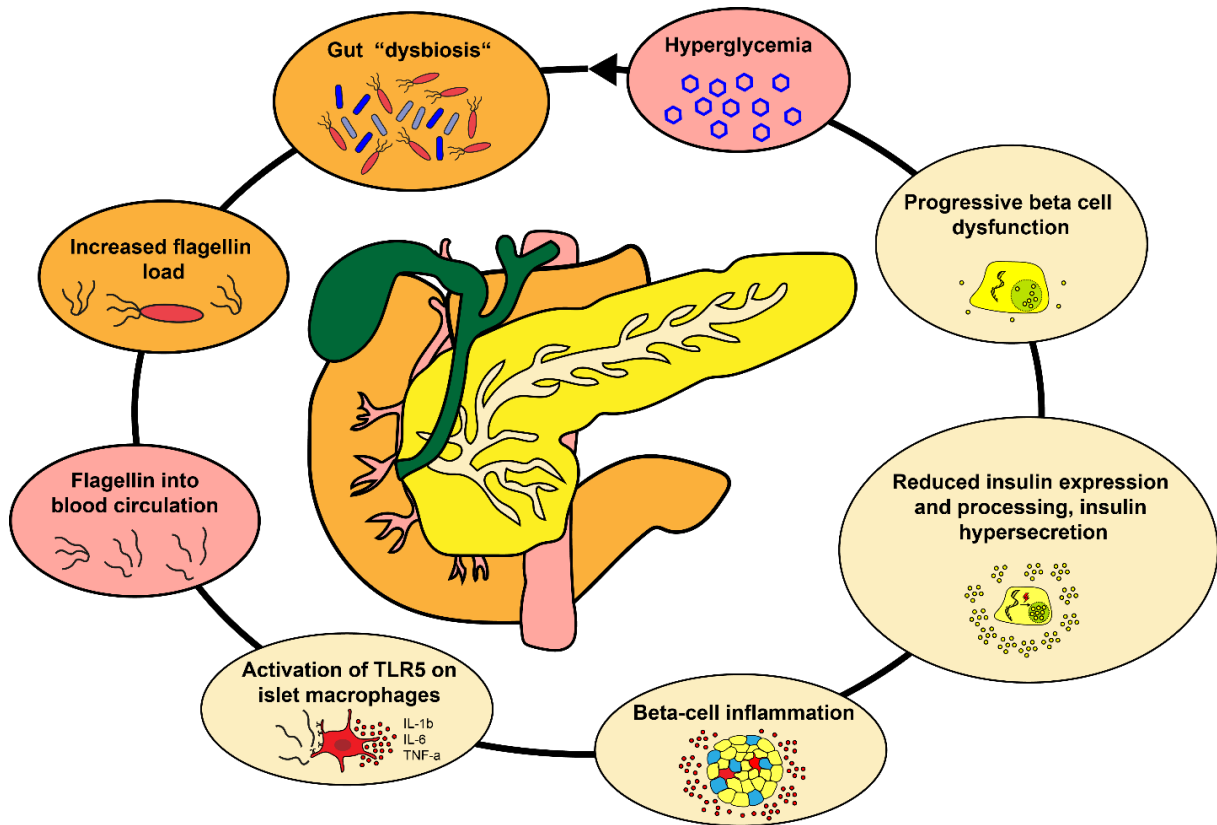

53

## 54 **Introduction**

55

56 While obesity is linked to insulin resistance, it is failure of pancreatic beta-cells that  
57 drives hyperglycemia and subsequent type 2 diabetes (T2D) (Weyer et al., 1999).  
58 Although in later stages of T2D insulin secretory rates are lowered, prior to the  
59 diagnosis and in earlier phases of the disease, insulin secretion is actually increased  
60 (DeFronzo, 2009). Insulin hypersecretion, particularly in the fasted state, is considered  
61 harmful as it associates with impaired proinsulin processing, insulin secretory stress  
62 and depletion of intracellular insulin stores (Pories and Dohm, 2012), further promoting  
63 obesity and T2D development (Mehran et al., 2012; Tricò et al., 2018; Weyer et al.,  
64 2000). Drivers of hyperinsulinemia are still elusive, but could relate to islet-exposure to  
65 excessive nutrients such as carbohydrates and lipids (Erion and Corkey, 2018), as well  
66 as a chronic low-grade inflammatory response known to be present in beta cells of  
67 people with T2D. In this regard, an influx of pro-inflammatory macrophages in islets of  
68 people with T2D has been noted (Donath and Shoelson, 2011; Marchetti, 2016). These  
69 macrophages produce pro-inflammatory cytokines such as interleukin (IL)-1 $\beta$  and IL-  
70 6, which have been associated with insulin hypersecretion (Ellingsgaard et al., 2011;  
71 Hajmrl et al., 2016) and beta-cell failure (Donath et al., 2009; Donath and Shoelson,  
72 2011). The triggers that ignite beta-cell inflammation in T2D remain presently unknown.

73 A recent player in the field of glucose metabolism is the intestinal microbiota.  
74 Several cohort (Le Chatelier et al., 2013) and intervention (Kootte et al., 2017) studies  
75 have shown an association between gut microbiota composition and T2D incidence  
76 (Gurung et al., 2020). People with obesity and T2D often have lower microbial diversity,  
77 while showing increased abundance of potentially pathogenic gram-negative bacteria,  
78 including Proteobacteria (Ouchi et al., 2011). Mechanistic studies have linked  
79 metabolites produced by the gut microbiota to impaired glucose metabolism and a pro-  
80 inflammatory state (Herrema and Niess, 2020). In addition to microbial metabolites,  
81 structural components of gram-negative bacteria, such as lipopolysaccharide (LPS), a  
82 cell-wall component, and flagellin, part of the bacterial locomotor appendage flagellum,  
83 may systemically disseminate in people with T2D (Gomes et al., 2017). These bacterial  
84 components activate pro-inflammatory pathways by binding to pattern-recognition  
85 receptors (PRRs), including Toll-like receptors (TLRs), expressed on epithelial cells  
86 and cells of the innate immune system (Scheithauer et al., 2020).

87           Here, we provide evidence for a novel pathway in which exaggerated systemic  
88 dissemination of gut-derived flagellin in T2D induces a pro-inflammatory state in beta-  
89 cells. This inflammatory response is mediated by flagellin-mediated activation of TLR5  
90 expressed on resident islet macrophages. Functionally, the inflammatory response  
91 associates with impaired insulin gene expression and proinsulin processing, while  
92 inducing hyperinsulinemia. Collectively, these processes markedly reduce insulin  
93 stores, which potentially contribute to beta-cell failure over time.

94 **Results**

95

96 ***Fecal Enterobacter cloacae* abundance is associated with hyperglycemia in**  
97 ***humans***

98 To investigate the link between beta-cell dysfunction and altered gut microbiota, we  
99 analyzed fecal samples for microbiota composition using 16S rRNA sequencing in  
100 participants enrolled in the Healthy Life in an Urban Setting (HELIUS) study, a  
101 prospective cohort study of the six largest ethnic groups living in Amsterdam, The  
102 Netherlands (Deschasaux et al., 2018; Snijder et al., 2017). To prevent confounding  
103 effects of ethnic differences on gut microbiota composition (Deschasaux et al., 2018),  
104 we analyzed the samples of the 803 Dutch origin participants (**Table S1**). We observed  
105 increased abundance of Gram-negative Enterobacteriaceae in people with T2D as  
106 compared to normoglycemic controls (**Figure 1A, Table S2**), confirming a previous  
107 report where Enterobacteriaceae were increased in people with T2D (Qin et al., 2012).  
108 We randomly selected 100 people with T2D and compared them to 50 age-, sex- and  
109 BMI-matched normoglycemic controls also recruited within the HELIUS cohort (**Table**  
110 **S3**). We confirmed an enrichment of Enterobacteriaceae in people with T2D using  
111 quantitative polymerase chain reaction (qPCR) (**Figure 1B**). Furthermore, we  
112 observed a positive relation with the long-term glucose marker hemoglobin A1c  
113 (HbA1c) and Enterobacteriaceae abundance (**Figure 1C**).

114

115 *Enterobacter cloacae* (*E. cloacae*), a prominent member of the family of  
116 Enterobacteriaceae, was previously shown to be associated with impaired glucose  
117 tolerance in humans and mice (Fei and Zhao, 2013; Keskitalo et al., 2018). In line with  
118 these studies, in our cohort, levels of *E. cloacae* directly increased with deterioration  
119 of glucose tolerance (**Figure 1D**). Further, fecal abundance of *E. cloacae* also  
120 positively correlated with HbA1c (**Figure S1A**). Thus, as a proof-of-concept, we  
121 selected *E. cloacae* for subsequent experiments although we acknowledge that other  
122 bacteria of the family Enterobacteriaceae may also associate with glucose  
123 (dys)metabolism.

124

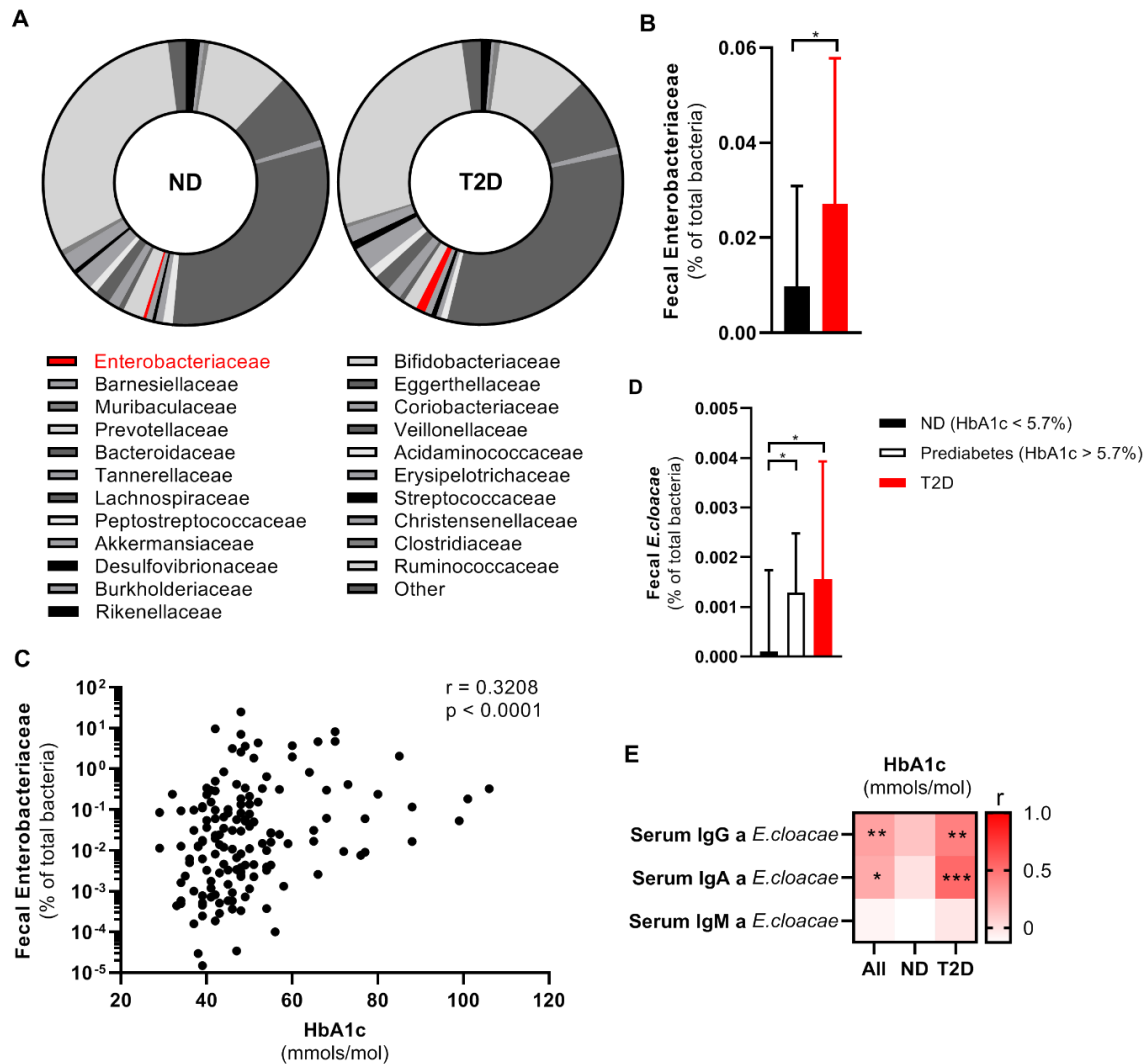

125

126 **Figure 1. Fecal Enterobacteriaceae is associated with a disturbed glucose tolerance in humans**  
 127 **from the HELIUS cohort.**

128 (A) Fecal microbiota composition of people with or without T2D measured via 16S rRNA sequencing  
 129 (Dutch origin participants, N = 803, % abundance, median is shown).

130 (B) Fecal Enterobacteriaceae (qPCR, normalized to total fecal bacterial DNA) is increased in individuals  
 131 with T2D compared to age-BMI-sex matched healthy controls (N = 150, median with 95% CI).

132 (C) Fecal Enterobacteriaceae (qPCR, normalized to total fecal bacteria) positively correlates with the  
 133 long-term glucose marker HbA1c (N = 150).

134 (D) Fecal *Enterobacter cloacae* (qPCR, normalized to total fecal bacteria) is increased in prediabetes  
 135 and T2D (N = 150, median with 95% CI).

136 (E) Correlation analysis of serum antibodies against *E. cloacae* and HbA1c (N = 80).

137 Mann Whitney test (B, D) and Spearman correlation (C, E); \* $p < 0.05$ , \*\* $p < 0.01$ , \*\*\* $p < 0.001$ .

138 Abbreviations: ND, no diabetes; T2D, type 2 diabetes; HbA1c, Glycated hemoglobin; Ig,  
 139 immunoglobulin; CI, confidence interval.

140

141 ***An immune response against *Enterobacter cloacae* is associated with***  
142 ***hyperglycemia in people with type 2 diabetes***

143 An appropriate immune response to opportunistic bacteria is necessary to prevent  
144 inflammation (Cullender et al., 2013b). To assess whether there was a systemic  
145 immune response to *E. cloacae*, we assessed plasma antibody levels. We observed a  
146 numerical increase in IgG titers against *E. cloacae* in T2D, but otherwise no significant  
147 difference between the matched groups with respect to antibodies was noted (**Figure**  
148 **S1B**). However, there was a positive correlation between HbA1c levels and systemic  
149 IgG and IgA against *E. cloacae* (**Figure 1E**), particularly in people with T2D. Further,  
150 there was a significant positive correlation between fecal abundance of  
151 Enterobacteriaceae and plasma IgG against *E. cloacae* (**Figure S1C**). This is  
152 suggestive of an immune response against systemically disseminated bacterial  
153 components of *E. cloacae*.

154

155 ***Enterobacter cloacae* induces beta-cell inflammation and dysfunction in vitro**

156 Given the link between beta-cell driven hyperglycemia and fecal presence of *E.*  
157 *cloacae* as well as systemic antibodies against *E. cloacae*, we questioned if *E. cloacae*  
158 would be able to alter pancreatic beta-cell function. We isolated pancreatic islets from  
159 C57BL6/J mice fed a conventional chow diet. Islets were co-incubated with 10<sup>6</sup> colony  
160 forming units (CFUs) per mL of heat-inactivated *E. cloacae* or vehicle for 72 hours  
161 (**Figure 2A-G**). We found that beta-cells exposed to heat-inactivated *E. cloacae* had  
162 lower expression of genes involved in insulin production, including the key transcription  
163 factors pancreatic duodenal homeobox 1 (*PDX1*) and *MafA* (**Figure 2A**). This lowered  
164 expression coincided with a higher inflammatory tone (**Figure 2B and 2C**), including  
165 upregulation of pro-inflammatory cytokines (*IL-1 $\beta$* , *IL-6* and tumor necrosis factor (*TNF- $\alpha$* ),  
166 the *NLRP3* inflammasome, the macrophage marker *F4/80*, and *TLR2*. Interestingly,  
167 increased *TLR2* expression was previously reported in pancreatic islets of people with  
168 diabetes (Ji et al., 2019). Heat-inactivated *E. cloacae* did not affect cell viability since  
169 ATP content was not altered (**Figure 2D**) (Iyer et al., 2009). Incubation with heat-  
170 inactivated *E. cloacae* also had functional consequences for beta cells. As such, insulin  
171 content was markedly reduced after 72 hours of incubation with *E. cloacae* (**Figure**  
172 **2E**). In addition, both during low- and high ambient glucose concentrations, beta cells  
173 treated with heat-inactivated *E. cloacae* hypersecreted insulin (**Figure 2F**). Lastly, *E.*  
174 *cloacae* treatment increased proinsulin secretion and content as well as



175 proinsulin/insulin ratios, indicating disturbed proinsulin processing (**Figure 2G**). We  
 176 observed similar data in human islets, where heat-inactivated *E. cloacae* lowered *MafA*  
 177 expression, increased secreted IL-6, and tended to reduce insulin content (**Figure**  
 178 **S2A-E**). Thus, the profile of increased inflammation, reduced insulin gene expression,  
 179 impaired proinsulin processing and insulin hypersecretion likely contributes to the  
 180 detrimental reduction in beta-cell insulin content.  
 181

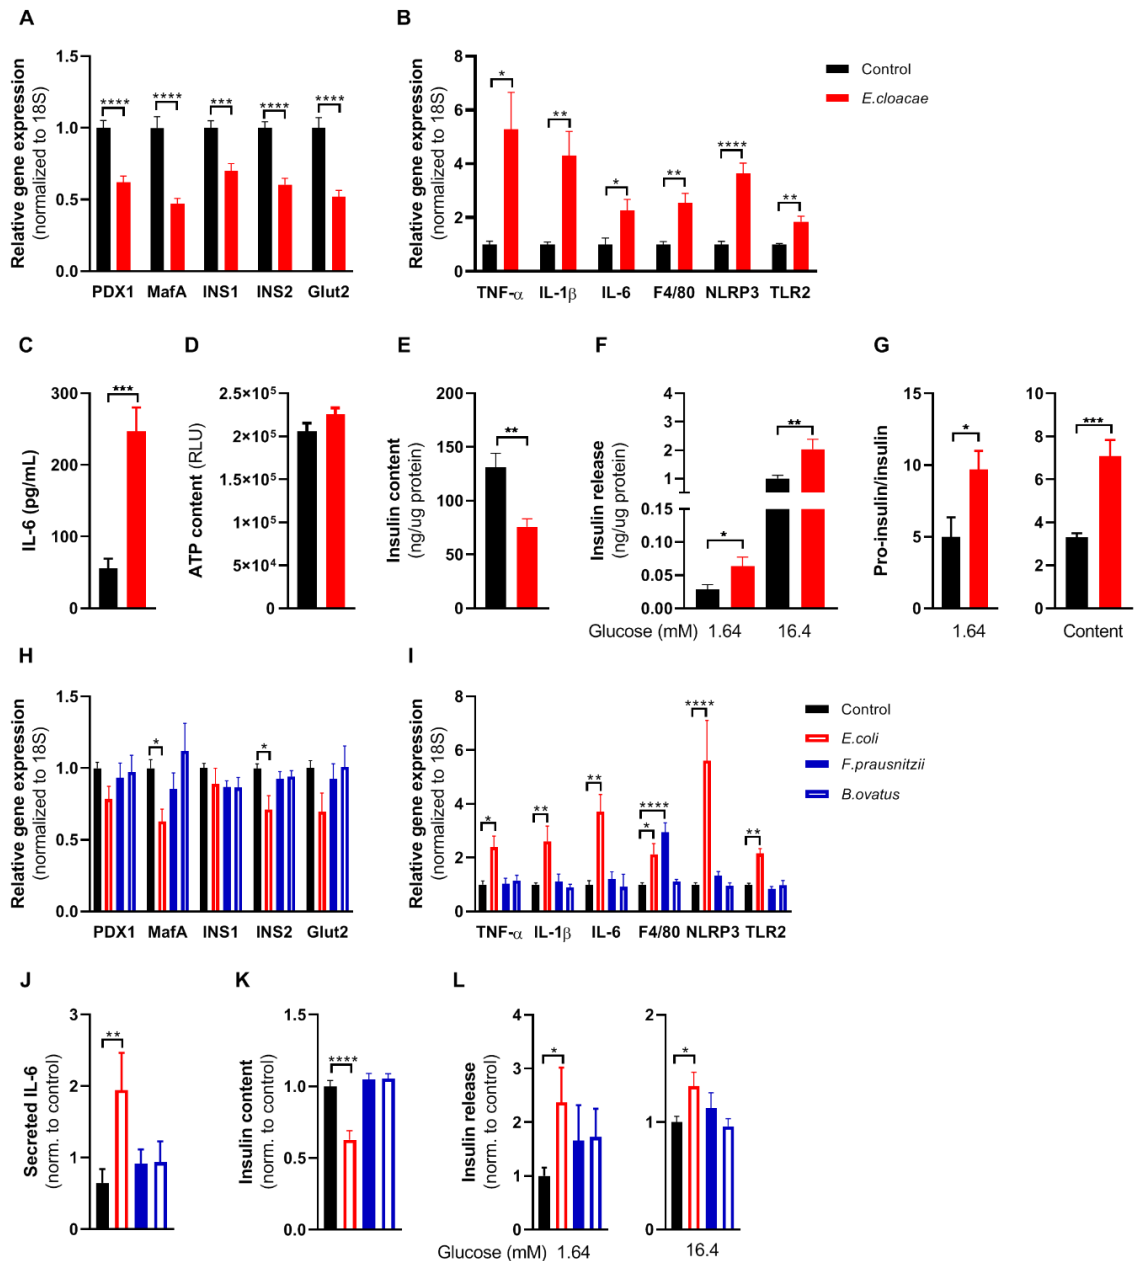

182

183 **Figure 2. Opportunistic pathogens, but not beneficial bacteria induce beta cell inflammation and**  
 184 **dysfunction**

185 Freshly isolated pancreatic islets from healthy C57BL6J mice were treated with heat-inactivated  
 186 bacteria for 72h (1E6 colony forming units/mL).

187 (A) *Enterobacter cloacae* (*E. cloacae*) reduces expression of beta-cell genes.  
188 (B) *E. cloacae* increases expression of inflammatory genes in islets.  
189 (C) *E. cloacae* increases IL-6 secretion by islets.  
190 (D) *E. cloacae* does not reduce ATP content in islets.  
191 (E) *E. cloacae* reduces insulin content in islets.  
192 (F) *E. cloacae* increases insulin secretion from islets during low- and high glucose conditions, denoting  
193 insulin hypersecretion.  
194 (G) *E. cloacae* increases the ratio between secreted pro-insulin and insulin, as well as the islet content  
195 of pro-insulin relative to insulin, indicating impaired insulin processing.  
196 (H) *Escherichia coli*, but not *Faecalibacterium prausnitzii* and *Bacteroides ovatus*, reduces expression  
197 of beta-cell genes  
198 (I) *E. coli*, but not *F. prausnitzii* and *B. ovatus* increases expression of inflammatory genes in islets.  
199 (J) *E. coli*, but not *F. prausnitzii* and *B. ovatus*, induces the release of IL-6 from islets into the media.  
200 (K) *E. coli*, but not *F. prausnitzii* and *B. ovatus* reduces insulin content in islets.  
201 (L) *E. coli*, but not *F. prausnitzii* and *B. ovatus* induces insulin hypersecretion versus controls at both  
202 low- and high-glucose conditions.  
203 Data shown are mean  $\pm$  SEM. Unpaired t-test (A, B, C, D, G, H, I, J) and Mann Whitney test (E, F, K, L)  
204 was used. Significance level: \* $p < 0.05$ , \*\* $p < 0.01$ , \*\*\* $p < 0.001$ , \*\*\*\* $p < 0.0001$  (mean  $\pm$  SEM, 3  
205 representative experiments per panel). Gene expression was normalized using *18s* as a housekeeping  
206 gene. Panels J-L were normalized to the control samples since the experiments were performed  
207 independently (each bacterium on different days). Abbreviations: PDX1, pancreatic and duodenal  
208 homeobox 1; INS1 and INS2, insulin 1 and 2; NLRP3, NACHT, LRR and PYD domains-containing  
209 protein 3; TNF- $\alpha$ , tumor necrosis factor-alpha; IL-1 $\beta$ , Interleukin 1 beta; IL-6, Interleukin 6; TLR2, Toll-  
210 like receptor 2; RLU, Relative light unit.  
211

## 212 ***Opportunistic pathogens, but not beneficial bacteria, induce beta-cell*** 213 ***inflammation and dysfunction***

214 Next, to address whether the *E. cloacae*-mediated effects were specific to this bacterial  
215 species, we repeated the experiments with *Escherichia coli* (*E. coli*), another Gram-  
216 negative bacterium from the group Enterobacteriaceae (Amar et al., 2011a). *E. coli*  
217 was also increased in T2D participants of the HELIUS study (**Figure S1D**). In line with  
218 our *E. cloacae* findings, *E. coli* reduced expression of genes regulating beta-cell  
219 maturation and function (**Figure 2H**) and induced an inflammatory response with  
220 increased expression of *IL-1 $\beta$* , *IL-6*, *TNF- $\alpha$* , the *NLRP3* inflammasome, *F4/80* and  
221 *TLR2* (**Figure 2I**), and IL-6 protein secretion (**Figure 2J**). *E. coli* also reduced cellular  
222 insulin content (**Figure 2K**) and increased insulin secretion (**Figure 2L**).

223 In order to rule out an effect of bacterial co-incubation *per se*, we investigated the  
224 effects of two bacteria that have been identified as beneficial for the host. These  
225 included the Gram-positive *Faecalibacterium prausnitzii* (Qin et al., 2012) and Gram-  
226 negative *Bacteroides ovatus* (Zhang et al., 2014), the abundance of which was  
227 decreased in people with T2D (**Figure S1E** and **S1F**). In contrast to *E. coli* and *E.*  
228 *cloacae*, *F. prausnitzii* and *B. ovatus* did not affect islet inflammation, insulin content or  
229 insulin secretion (**Figure 2H-L**). These data indicate that only a subset of bacteria  
230 induce an inflammatory response and beta-cell dysfunction. Based on previous mouse

231 data linking *E. cloacae* to impaired glucose tolerance (Fei and Zhao, 2013), we decided  
232 to further scrutinize the effect of this bacterium on beta-cell function as proof-of-  
233 concept.

234

235 ***Toll-like receptor-2 and Toll-like receptor-4 deletion do not protect against***  
236 ***Enterobacter cloacae-induced beta-cell inflammation and dysfunction***

237 TLR2 and TLR4 are involved in beta-cell replication (Ji et al., 2019) and have been  
238 proposed as two key PRR's that mediate the inflammatory response induced by  
239 endogenous and exogenous molecules, the latter including bacterial components such  
240 as LPS (Takeuchi et al., 1999). In addition, TLR2 and TLR4 are expressed by  
241 pancreatic islet cells (Akira and Takeda, 2004; Giarratana et al., 2004; Wen et al.,  
242 2004). Therefore, we isolated islets from TLR2 and TLR4 knock out mice and  
243 incubated them with *E. cloacae* (**Figure S3**). Despite the absence of TLR2, *E. cloacae*  
244 reduced insulin gene expression including *MafA* (**Figure S3A**), increased expression  
245 of pro-inflammatory cytokines (**Figure S3B**), increased secreted IL-6 (**Figure S3C**),  
246 and reduced insulin content (**Figure S3D**).

247 Similarly, TLR4-deficient islet cells were not protected from the effects of *E. cloacae*,  
248 as the expression of beta-cell genes including *INS2* was still reduced (**Figure S3F**).  
249 Regarding inflammation, while the expression of *IL-1 $\beta$* , *NLRP3* inflammasome and  
250 *F4/80* was similarly increased by *E. cloacae* in both TLR4 knock out and WT islets, *E.*  
251 *cloacae* incubation did not increase *IL-6* expression and secretion (**Figure S3G-H**).  
252 Insulin content was also reduced by *E. cloacae* incubation (**Figure S3I and S3J**).  
253 Therefore, we concluded that PRRs other than TLR2 and TLR4 likely play roles in *E.*  
254 *cloacae*-induced beta-cell inflammation and dysfunction.

255

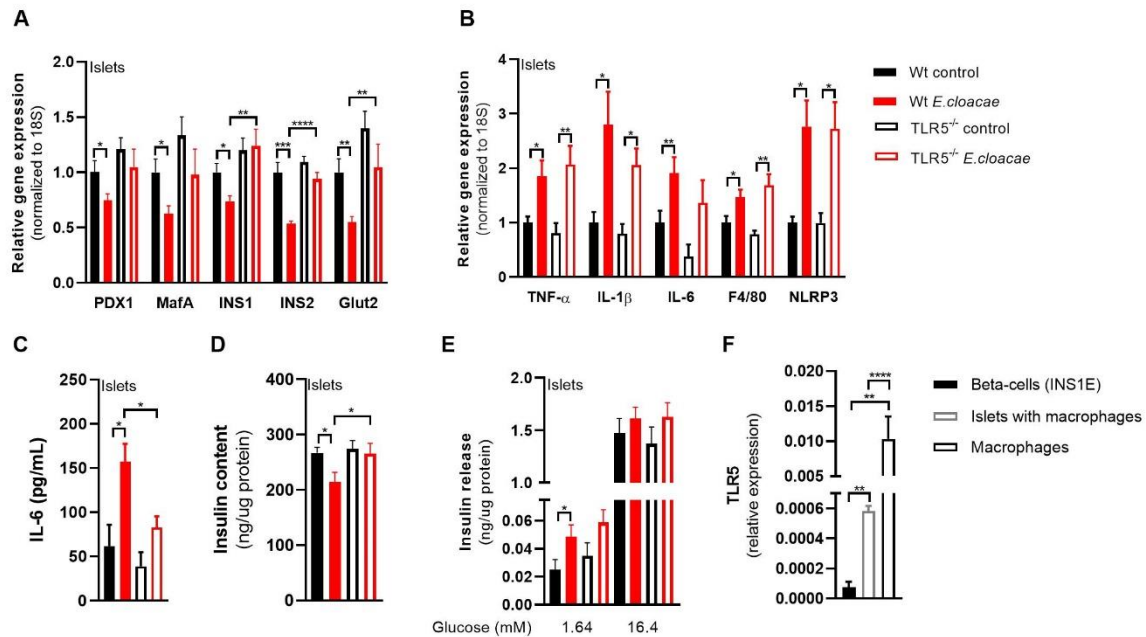

256

257 **Figure 3. TLR5 is mediating beta cell dysfunction in pancreatic islets**

258 Freshly isolated pancreatic islets from C57BL6J TLR5<sup>-/-</sup> mice (10 weeks old) were treated with heat-  
 259 inactivated *Enterobacter cloacae* (1E6 CFUs/mL) for 72h.

260 (A) *E. cloacae* reduces beta-cell gene expression. TLR5 knock out protects from *E. cloacae*-induced  
 261 insulin and Glut2 expression loss.

262 (B) *E. cloacae* increases beta-cell inflammation. TLR5 knock out does not prevent the effect of *E.*  
 263 *cloacae* on pancreatic islet inflammation.

264 (C) *E. cloacae* increases beta-cell IL-6 secretion. TLR5 knock out partially protects from *E. cloacae*  
 265 induced IL-6 secretion.

266 (D) *E. cloacae* reduces beta-cell insulin content. TLR5 knock out protects from *E. cloacae*-induced  
 267 insulin content loss.

268 (E) *E. cloacae* induces insulin hypersecretion at low glucose condition in wild-type islets, which is not  
 269 different in TLR5 knock out islets.

270 (F) Clonal beta cells express very low levels of TLR5 compared to pancreatic islets and macrophages.  
 271 Data shown are mean ± SEM. Unpaired t-test was used for statistical analysis (A-C, F) or Mann-Whitney  
 272 test (D, E). Significance level: \*p<0.05, \*\*p<0.01, \*\*\*p<0.001, \*\*\*\*p<0.0001 (mean ± SEM, 3  
 273 representative experiments per panel).

274 Abbreviations: PDX1, pancreatic and duodenal homeobox 1; INS1 and INS2, insulin 1 and 2; NLRP3,  
 275 NACHT, LRR and PYD domains-containing protein 3; TNF-α, tumor necrosis factor-alpha; IL-1β,  
 276 Interleukin 1 beta; IL-6, Interleukin 6; TLR2, Toll-like receptor 2; TLR5, Toll-like receptor 5.

277

278 **Toll-like receptor-5 deletion protects against *Enterobacter cloacae*-induced**  
 279 **beta-cell inflammation and dysfunction**

280 Several members of Enterobacteriaceae, including *E. cloacae*, express flagellins as  
 281 both virulence and motility factors (De Maayer and Cowan, 2016). Bacterial flagellin is  
 282 mainly recognized by TLR5 (Yoon et al., 2012), which is expressed by various cell  
 283 types including epithelial cells and monocytes. We measured the effects of *E. cloacae*  
 284 in islets from TLR5 knock out mice. TLR5 deletion partially protected islets from beta-  
 285 cell dysfunction with preserved expression of insulin genes (Figure 3A). TLR5  
 286 deficiency did not reduce the effects of *E. cloacae* on expression of pro-inflammatory

287 cytokines (**Figure 3B**), although it did reduce secretion of IL-6 as compared to WT  
288 islets (**Figure 3C**). In addition, in TLR5 knock out islets, *E. cloacae* did not reduce  
289 insulin content (**Figure 3D**), while similar insulin secretion rates were observed versus  
290 WT islets (**Figure 3E**).

291 To further assess the role of TLR5 in mediating the effects of *E. cloacae*, we co-  
292 incubated WT primary mouse islets with *E. cloacae* with or without the TLR5 inhibitor  
293 TH1020. As TH1020 proved toxic to cells after prolonged incubation, we studied the  
294 islets after 6 hours of treatment. In line with TLR5 knock out islets, TH1020 reduced  
295 the effects of *E. cloacae* on beta-cell gene expression (partial preservation of *PDX1*  
296 and *MafA* expression) and partially offset the *E. cloacae*-induced expression of *IL-1 $\beta$* ,  
297 *IL-6* and *NLRP3* (**Figure S4A-B**). Due to the toxic effects of TH1020, particularly on  
298 GLUT2 expression, we did not perform glucose stimulated insulin secretion (GSIS).

299

### 300 ***Macrophages mediate Enterobacter cloacae-induced beta cell inflammation and*** 301 ***dysfunction via TLR5 activation***

302 As TLR5 is barely expressed in beta cells (**Figure 3F**), we concluded that other islet  
303 associated cells in the pancreas, particularly resident islet macrophages, could  
304 mediate the observed effects of TLR5 activation. Indeed, macrophages as well as  
305 pancreatic islets containing macrophages had higher TLR5 expression than pure beta  
306 cells (**Figure 3F**). Macrophages are important for pancreatic islet physiology  
307 (Nackiewicz et al., 2020), but can induce beta-cell dysfunction when activated towards  
308 a pro-inflammatory phenotype (Ying et al., 2019). We thus depleted macrophages from  
309 murine pancreatic islets using clodronate-liposomes (Nackiewicz et al., 2014), followed  
310 by *E. cloacae* incubation (**Figure 4A-E**). Reduction of islet macrophages resulted in  
311 the maintenance of beta-cell gene transcription following *E. cloacae* treatment (**Figure**  
312 **4A**). Further, expression of pro-inflammatory cytokines including *IL-1 $\beta$*  and *NLRP3* was  
313 reduced (**Figure 4B**). Particularly, IL-6 secretion was almost abolished (**Figure 4C**).  
314 Insulin content (**Figure 4D**) and insulin secretion (**Figure 4E**) were not affected by *E.*  
315 *cloacae* in islets lacking macrophages. In line with a role for islet resident  
316 macrophages, we found that pure beta cells (INS1E clonal cell line) did not show  
317 inflammation or beta-cell dysfunction following *E. cloacae* treatment (**Figure S5A-D**).  
318 Further, human islet organoids that consist of pure human endocrine cells, did not  
319 show signs of beta-cell dysfunction upon *E. cloacae* treatment (**Figure S5E-F**). Further

320 evidence for the mediating role of macrophages, *E. coli* and *E. cloacae* induced an  
 321 inflammatory response in monocytes, which was less present for *F. prausnitzii* and *B.*  
 322 *ovatus* (**Figure S5G**). The *E. cloacae*-induced increase in IL-6 secretion could be  
 323 reduced by pharmacological TLR5 inhibition (**Figure S5H**). These results collectively  
 324 indicate that islet-resident macrophages play a major role in *E. cloacae*-induced islet-  
 325 cell inflammation and dysfunction.  
 326

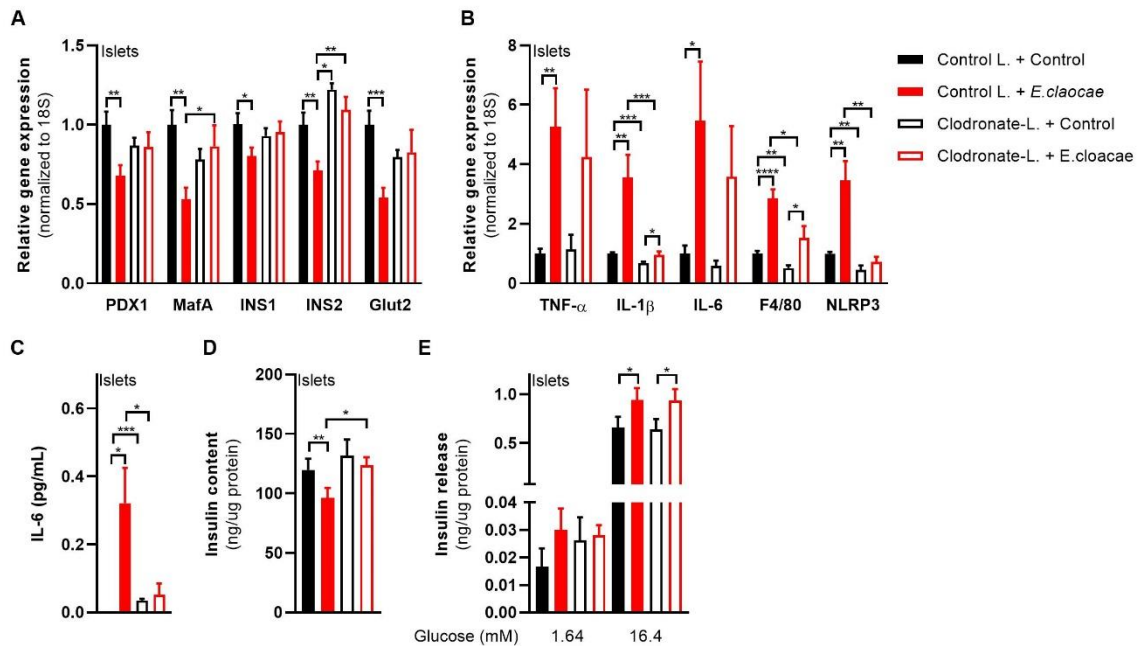

327

328 **Figure 4. Macrophages mediate beta cell dysfunction in pancreatic islets**

329 Macrophage-depleted islets from wild-type C57BL6J mice were treated with heat-inactivated  
 330 *Enterobacter cloacae* (1E6 CFUs/mL) for 72h.

331 (A) *E. cloacae* reduces beta-cell gene expression. Macrophage depletion in pancreatic islets protects  
 332 from *E. Cloacae*- induced reduction in beta-cell gene expression.

333 (B) *E. cloacae* increases beta-cell inflammation. Macrophage depletion in pancreatic islets reduces *E.*  
 334 *Cloacae*- induced inflammation.

335 (C) *E. cloacae* increases beta-cell IL-6 secretion which is prevented by macrophage depletion in  
 336 pancreatic islets.

337 (D) *E. cloacae* reduces insulin content, which is prevented by macrophage depletion.

338 (E) *E. cloacae* induces insulin hypersecretion both in WT and in macrophage depleted islets.

339 Data shown are mean ± SEM. Unpaired t-test was used for statistical analysis (A-K). Significance level:  
 340 \*p < 0.05, \*\*p < 0.01, \*\*\*p < 0.001, \*\*\*\*p < 0.0001 (mean ± SEM, 3 representative experiments per panel).

341 Abbreviations: PDX1, pancreatic and duodenal homeobox 1; INS1 and INS2, insulin 1 and 2; NLRP3,  
 342 NACHT, LRR and PYD domains-containing protein 3; TNF-α, tumor necrosis factor-alpha; IL-1β,  
 343 Interleukin 1 beta; IL-6, Interleukin 6; TLR2, Toll-like receptor 2; TLR5, Toll-like receptor 5.  
 344

345 **Bacterial flagellin induces beta-cell inflammation and dysfunction**

346 Flagellin is the main ligand for TLR5 (Hug et al., 2018) and therefore we hypothesized

347 that this bacterial component could be the driving force behind the *E. cloacae*-induced

348 phenotype. Indeed, both flagellin and flagellin-bearing *E. cloacae* activated TLR5 in a

349 human embryonic kidney (HEK) reporter cell line (**Figure 5A**), which was dose-  
350 dependently inhibited by the TLR5 inhibitor TH1020. Furthermore, flagellin induced a  
351 pro-inflammatory response in human macrophages, which was reduced when co-  
352 incubated with TH1020 (**Figure 5B**). Additionally, flagellin impaired insulin gene  
353 expression (**Figure 5C**), induced beta-cell inflammation (**Figure 5D-E**) and reduced  
354 insulin content (**Figure 5F**) while promoting insulin hypersecretion in pancreatic islets  
355 (**Figure 5G**), thus resembling the phenotype induced by *E. cloacae*.

356 To further dissect the role of flagellin in the beta-cell deteriorating effects mediated by  
357 *E. cloacae*, we generated an *E. cloacae*-flagellin strain ( $\Delta fliC\Delta fljB$ ) lacking both *fliC* and  
358 *fljB*. FliC and FljB are two different flagellar filament proteins, and homologous to those  
359 expressed by *Salmonella enterica* (Bonifield and Hughes, 2003). Compared to wild-  
360 type *E. cloacae*, *E. cloacae*  $\Delta fliC\Delta fljB$  did not suppress beta-cell gene transcription  
361 (**Figure 5H**). In addition, expression of inflammatory cytokines and secreted IL-6 were  
362 lower in islets exposed to the  $\Delta fliC\Delta fljB$  strain as compared to islets exposed to wild-  
363 type *E. cloacae* (**Figure 5I-J**). Islets had higher insulin content after incubation with the  
364  $\Delta fliC\Delta fljB$  strain as compared to wild-type *E. cloacae* (**Figure 5K**). Finally, the  
365  $\Delta fliC\Delta fljB$  strain did not induce fasting insulin hypersecretion (**Figure 5L**). Collectively,  
366 these results strongly suggest that flagellin, as part of the flagellum carried by bacteria  
367 belonging to Enterobacteriaceae, plays a pivotal role in beta-cell inflammation and  
368 beta-cell dysfunction via TLR5 activation on resident islet macrophages.

369

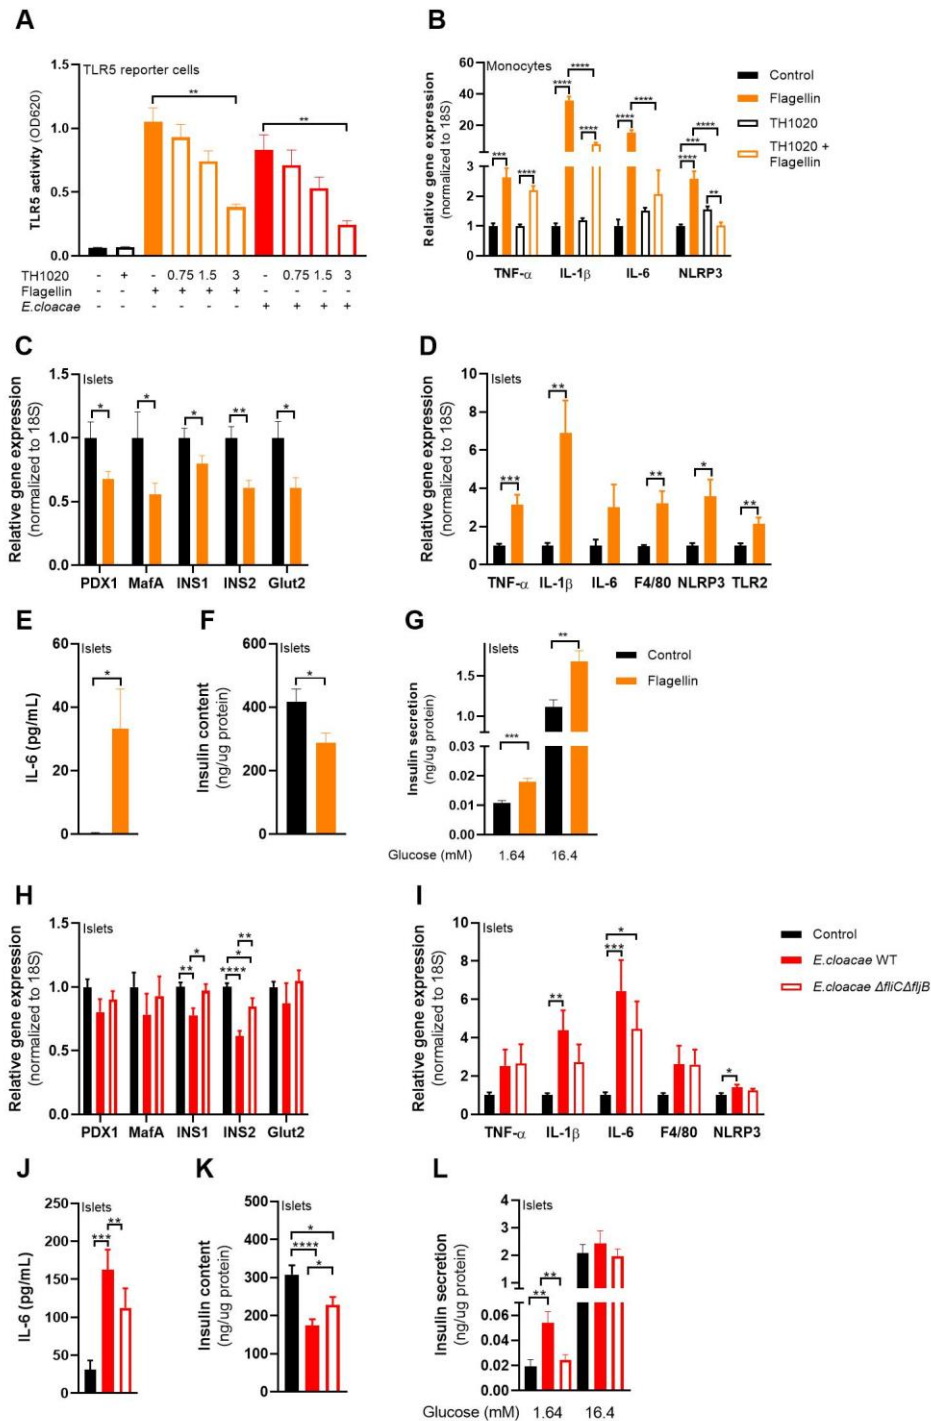

370

371 **Figure 5. Flagellin induces beta cell dysfunction in pancreatic islets**

372 HEK TLR5 reporter cell line (A), human monocytes (B) and pancreatic islets (C-L) from C57BL6J mice  
 373 were incubated with flagellin (100 ng/mL), *E. cloacae* (1E6 CFUs/mL) or flagellin knock out *E. cloacae*  
 374 (H-L).

375 (A) Flagellin and *E. cloacae* activate TLR5 in HEK reporter cell line. TLR5 inhibitor TH1020 inhibits  
 376 receptor activity dose-dependently (in  $\mu$ M).

377 (B) Flagellin increases expression of inflammatory genes in macrophages, which is reduced by TLR5  
 378 inhibitor TH1020 (3  $\mu$ M).

379 (C) Flagellin reduces beta-cell gene expression.

380 (D) Flagellin increases expression of inflammatory genes in islets.

381 (E) Flagellin increases secreted IL-6 by islets.



382 (F) Flagellin reduces insulin content in islets.  
383 (G) Flagellin induces insulin hypersecretion in islets.  
384 (H) *E. cloacae* reduces beta-cell gene expression. Knock out of flagellin in *E. Cloacae* partially protects  
385 against this loss of gene expression.  
386 (I) *E. cloacae* induces beta-cell gene inflammation. Knock out of flagellin in *E. Cloacae* partially protects  
387 against this inflammatory response.  
388 (J) *E. cloacae* stimulates IL-6 secretion by islets. Knock out of flagellin in *E. Cloacae* partially protects  
389 against this enhanced IL-6 release.  
390 (K) *E. cloacae* reduces beta-cell insulin content. Knock out of flagellin in *E. Cloacae* protects against  
391 this loss of insulin stores.  
392 (L) *E. cloacae* induces insulin hypersecretion at low glucose. Knock out of flagellin in *E. Cloacae* protects  
393 against this impaired secretory response.  
394 Data shown are mean  $\pm$  SEM. Unpaired t-test (A-E, H-J) or Mann-Whitney (F, G, K, L) test was used for  
395 statistical analysis: \*p<0.05, \*\*p<0.01, \*\*\*p<0.001, \*\*\*\*p<0.0001.  
396 Abbreviations: INS1 and INS2, insulin 1 and 2; NLRP3, NACHT, LRR and PYD domains-containing  
397 protein 3; IL-1 $\beta$ , Interleukin 1 beta; IL-6, Interleukin 6; TLR, toll like receptor;  $\Delta$ fliC $\Delta$ fliJ $\Delta$ B, flagelline genes  
398 knock out.  
399

#### 400 ***Flagellin treatment augments insulin secretion in mice***

401 To translate beta-cell dysfunction inducing effects of flagellin to an *in vivo* situation, we  
402 injected flagellin intraperitoneally into diet-induced obese (DIO) C57BL6J mice twice  
403 weekly for four weeks (**Figure 6A**). Flagellin injection did not alter body weight or  
404 fasting glucose (**Figure 6B-C**). However, flagellin-treated mice had lower glucose  
405 levels during an intraperitoneal glucose tolerance test compared to the placebo group  
406 (**Figure 6D-E**), which was driven by increased insulin secretion (**Figure 6F**) since  
407 insulin sensitivity did not differ between groups (**Figure 6G-H**). Similar to the *in vitro*  
408 experiments, there was a higher inflammatory tone in the pancreas of flagellin-treated  
409 mice as shown by higher *IL-1 $\beta$*  expression (**Figure 6I**) and a trend towards more  
410 inflammation in pancreatic islets isolated from flagellin-treated mice (**Figure 6K**).  
411 Insulin content of isolated islets did not differ between groups, while insulin release  
412 tended to increase during glucose-stimulated insulin secretion *ex vivo* in islets isolated  
413 from the flagellin group (**Figure 6J-M**). These results suggest that flagellin-induced  
414 transcriptional and functional alterations in beta-cell function, as observed *in vitro*,  
415 could be largely replicated *in vivo* in a mouse model.  
416

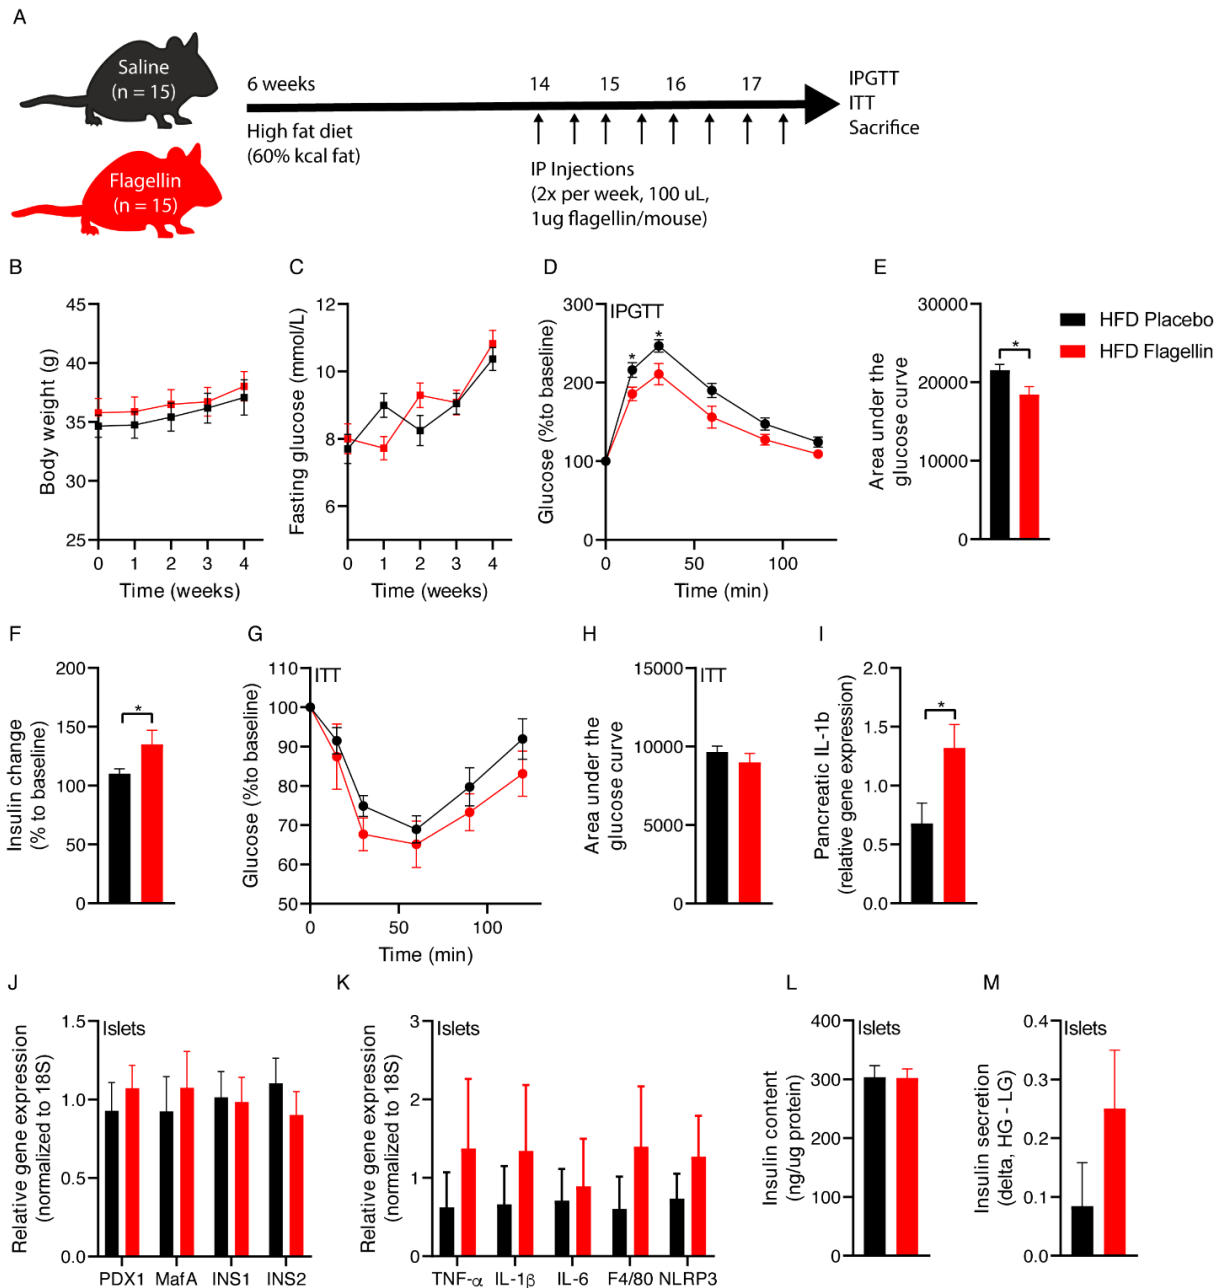

417

418 **Figure 6. Flagellin injection in mice disturbs glucose tolerance**

419 (A) Six-week old mice were fed a high fat diet (60%kcal fat) for 12 weeks. In the last 4 weeks of the diet,

420 the mice were injected with either 1 ug flagellin in 100 uL saline or saline alone twice weekly.

421 (B) Flagellin injections do not change the body weight.

422 (C) Flagellin injections do not change fasting plasma glucose concentrations.

423 (D, E) Flagellin-injected mice have improved glucose tolerance compared to placebo-treated mice

424 (lower area under the glucose curve).

425 (F) Fold change (15 min to baseline) of plasma insulin is greater in flagellin-treated mice compared to

426 placebo (n = 10).

427 (G, H) Insulin sensitivity is not affected by flagellin injection (0.75 IU/kg). The relative change in glucose

428 to baseline is shown.

429 (I) Flagellin increases pancreatic IL-1b expression.

430 (J) Pancreatic islets were isolated from flagellin or saline treated mice, rested for 3 hours and gene

431 expression was measured. Flagellin injections do not affect beta-cell gene expression (n = 5).

432 (K) Flagellin injection numerically increases markers of beta cell inflammation (n = 5).

433 (L) Insulin content was measured after islets were treated first with low glucose, followed by high glucose

434 for 1h each. Flagellin injection does not affect insulin content (n =5)

435 (M) Glucose stimulated insulin secretion was performed on islets and insulin release was measured at  
436 low as well as high glucose condition for 1h each. Flagellin injection numerically increases insulin  
437 release from beta cells (n = 5)  
438 Data shown are mean  $\pm$  SEM. Unpaired t-test (E, F, I) or Šídák's multiple comparisons test (D) was  
439 used \*p<0.05, \*\*p<0.01, \*\*\*p<0.001, \*\*\*\*p<0.0001.  
440 Abbreviations: INS1 and INS2, insulin 1 and 2; NLRP3, NACHT, LRR and PYD domains-containing  
441 protein 3; IL-1 $\beta$ , Interleukin 1 beta; IL-6, Interleukin 6; TNF- $\alpha$ , tumor necrosis factor-alpha; ITT, insulin  
442 tolerance test, IP, intraperitoneal; IPGTT, IP glucose tolerance test; HG, high glucose; LG, low glucose.  
443

#### 444 ***Systemic flagellin dissemination relates to beta-cell dysfunction in humans***

445 Fecal flagellin has been reported to be increased in obese people compared to lean  
446 controls (Tran et al., 2019). Similarly, we observed that obese mice had a higher  
447 flagellin load compared to lean mice (**Figure S6**). We predicted fecal flagellin gene  
448 abundance in the 150 HELIUS participants by inference from 16S rRNA profiles using  
449 PICRUSt (**Table S3, Figure 7A**). Fecal flagellin gene abundance was increased in  
450 T2D (**Figure 7B**). Next, we measured bacterial flagellin in the human blood circulation  
451 of the HELIUS cohort. While there was no difference between the matched obese  
452 groups, we did observe a positive correlation between serum flagellin load and HbA1c  
453 in T2D (**Figure 7C**). We hypothesized that increased flagellin reaches the circulation  
454 following a meal, which was previously shown to drive translocation of endotoxins  
455 (Ghoshal et al., 2009). We therefore measured postprandial plasma flagellin, C-peptide  
456 and plasma glucose in 80 matched participants of our bariatric surgery cohort (Van  
457 Olden et al., 2021) comprising obese normoglycemic and obese T2D people during a  
458 mixed-meal test (MMT) (**Figure 7A, Table S4**). C-peptide was chosen as it reflects  
459 insulin secretion rates and is not affected by potential differences in clearance by the  
460 liver, as is the case for plasma insulin concentrations. The MMT additionally allowed  
461 us to study the relationship between meal-induced flagellin and beta-cell response to  
462 an MMT. Participants with T2D had hyperglycemia following the MMT (**Figure 7D-E**)  
463 and lower C-peptide concentrations (**Figure 7F-G**) compared to normoglycemic  
464 humans with obesity. In both groups, flagellin increased during the MMT (**Figure 7H**).  
465 Postprandial area under the curve (AUC) for flagellin correlated with AUC C-peptide  
466 (**Figure 7I**), highlighting the link between bacterial flagellin and beta-cell insulin  
467 secretion in human beta-cell physiology.  
468

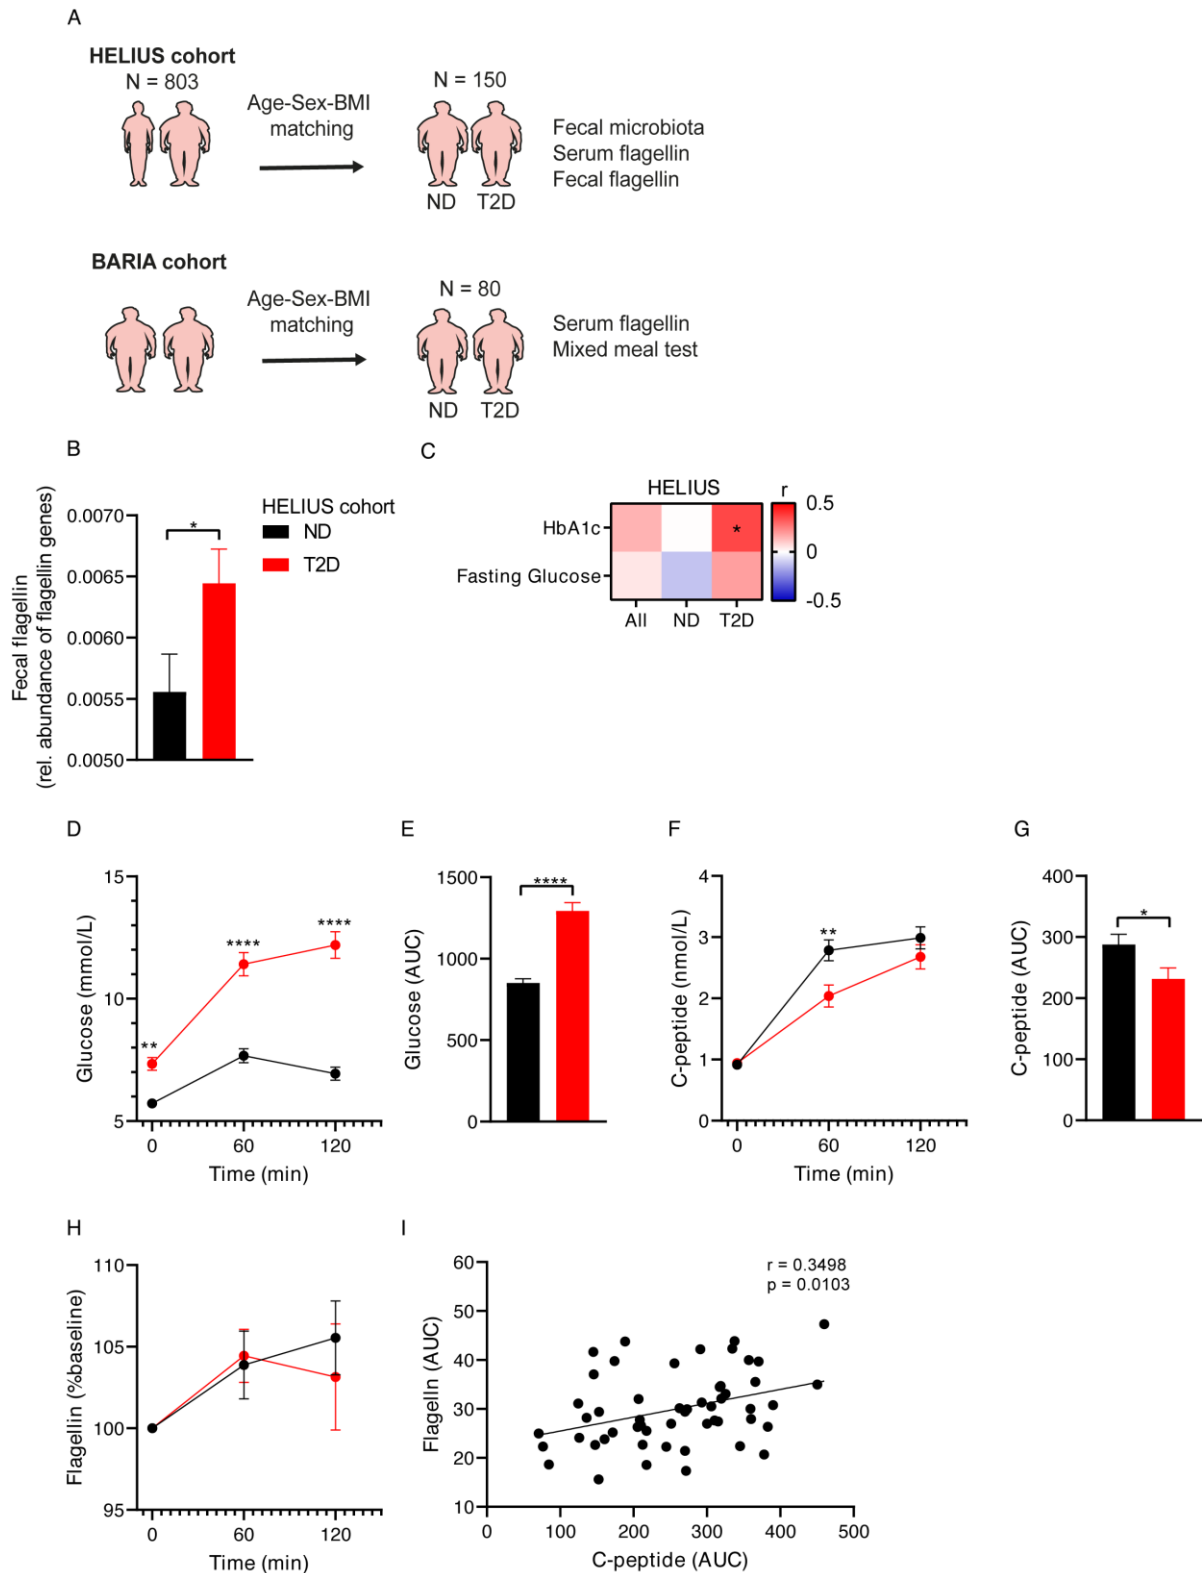

469

470

471

472

473

474

475

476

477

**Figure 7. Fecal and serum flagellin is associated with glucose intolerance in humans**

(A) 150 people were randomly selected from the HELIUS cohort (Snijder et al., 2017). Participants with T2D were matched with normoglycemic controls according to age, sex and BMI. In addition, 80 participants were selected from our bariatric surgery cohort (Van Olden et al., 2021).

(B) Fecal flagellin genes are increased in T2D, as inferred from 16S rRNA gene profiles (HELIUS).

(C) Serum flagellin positively correlates with HbA1c in people with T2D (HELIUS).

(D, E) Plasma glucose concentrations during a mixed meal test (BARIA). Glucose levels are higher in people with T2D compared to normoglycemic obese controls.

(F, G) Plasma C-peptide concentrations during a mixed meal test (BARIA). C-peptide levels are higher in people with T2D compared to normoglycemic obese controls.

478 (F, G) Plasma C-peptide concentrations during a mixed meal test (MMT) (BARIA). C-peptide levels  
479 are higher in the obese normoglycemic controls versus T2D participants.  
480 (H) Serum flagellin increases during a mixed meal test (BARIA).  
481 (I) A positive correlation between serum flagellin area under the curve (AUC) and plasma C-peptide  
482 AUC during the MMT (BARIA) exists.  
483 Data shown are mean  $\pm$  SEM. Unpaired t-test (B, E, G) , Spearman correlation (C, I) and Šídák's  
484 multiple comparisons test (D, F) was used: \* $p < 0.05$ , \*\* $p < 0.01$ , \*\*\* $p < 0.001$ , \*\*\*\* $p < 0.0001$ .  
485 Abbreviations: HELIUS, Healthy Life in an Urban Setting; AUC, Area under the curve.

## 486 **Discussion**

487 In this study, we reveal a novel pathway by which flagellin, a structural component of  
488 notably Gram-negative bacteria residing in the gut, systemically disseminates following  
489 food ingestion. In pancreatic islets that are abundantly vascularized (Brissova and  
490 Powers, 2008), we propose that flagellin activates the innate immune system and  
491 induces an inflammatory response following binding to TLR5 receptors expressed by  
492 resident islet macrophages. This leads to beta-cell dysfunction, characterized by  
493 impaired insulin gene expression, impaired insulin processing, insulin  
494 hypersecretion/hyperinsulinemia and reduced insulin cell content. This study provides  
495 a new insight into the link between gut microbiota composition and T2D.

496 Beta-cell dysfunction is the key abnormality that leads to the development of  
497 hyperglycemia and T2D. Beta-cell dysfunction is characterized by inappropriate fasted  
498 or postprandial insulin secretion, which can either be excessive or insufficient, upon  
499 exposure to glucose or other nutrients (Johnson, 2021). While in the later stages of the  
500 disease insulin secretion rates are hampered, in people with prediabetes or early after  
501 diagnosis of T2D, hyperinsulinemia is often observed (Weyer et al., 2001). The role of  
502 hyperinsulinemia in T2D development has received ample attention. While initially  
503 reported to be a response against obesity-related insulin resistance, research has  
504 indicated that increased insulin secretion can develop in the absence of insulin  
505 resistance implying primary beta-cell pathology (Staimez et al., 2013). Importantly,  
506 hyperinsulinemia *per se* has negative effects.

507 Induction of hyperinsulinemia has been shown to promote obesity (Mehran et al.,  
508 2012), while prevention of hyperinsulinemia by pancreas-specific genetic knock out of  
509 insulin expression prevented obesity, improved insulin sensitivity and did not result in  
510 overt hyperglycemia (Mehran et al., 2012; Templeman et al., 2015; Templeman et al.,  
511 2017). With respect to the pancreatic islets, a chronic demand on beta cells to produce  
512 insulin is detrimental. As such, a prolonged increase in insulin secretory rates have  
513 been related to endoplasmic reticulum (ER) stress, depletion of intracellular insulin  
514 stores and beta-cell apoptosis (Hasnain et al., 2014). Pancreatic islets from individuals  
515 with T2D have lower insulin content compared to healthy controls (Cantley and  
516 Ashcroft, 2015; Henquin, 2019; Rahier et al., 2008; Rosengren et al., 2012). In mice,  
517 hyperglycemia leads to insulin content loss (Brereton et al., 2014). Reversibly,

518 strategies that induce beta-cell rest are linked to improved beta-cell function over time  
519 (van Raalte and Verchere, 2017).

520 Current evidence relates overnutrition of carbohydrates and non-esterified fatty acids  
521 to beta-cell dysfunction (Esser et al., 2020). Another factor concerns a low-grade  
522 inflammatory response (Hajmrle et al., 2016). Beta-cell inflammation is a known  
523 hallmark of islets in people with T2D (Boni-Schnetzler and Meier, 2019) and a central  
524 role in this regard has been proposed for islet macrophages (Ehse et al., 2007).  
525 Macrophages are essential for normal beta-cell function and physiology (Nackiewicz  
526 et al., 2020), however, macrophages with a pro-inflammatory phenotype have been  
527 linked to beta-cell dysfunction (Nackiewicz et al., 2014). Triggers for activation of pro-  
528 inflammatory macrophages are uncertain but may involve hyperglycemia (Maedler et  
529 al., 2001), dyslipidemia (Igoillo-Esteve et al., 2010) and human islet amyloid  
530 polypeptide (hIAPP) (Westwell-Roper et al., 2014).

531  
532 Here, we show an infectious stimulus triggering inflammation and beta-cell dysfunction:  
533 flagellin derived from intestinal microbiota. While Gram-negative bacteria are known to  
534 produce the canonical flagellin which is studied here, several other intestinal Firmicutes  
535 species are motile and have been described to contain flagella, including several  
536 *Roseburia*, *Clostridium*, and *Lactobacillus* spp (Dehoux et al., 2016; MM et al., 2015;  
537 Tamanai-Shacoori et al., 2017). However, the flagellins of these latter, Gram-positive  
538 bacteria have not been well characterized and some are glycosylated resulting in  
539 attenuated TLR5 signaling efficiency (Kajikawa et al., 2016).

540 A first link towards flagellin came from the observation that in a large cohort the fecal  
541 abundance of the family of Enterobacteriaceae, specifically *E. cloacae*, was increased  
542 in people with T2D and that the fecal abundance of Enterobacteriaceae and *E. cloacae*  
543 correlated with glucose intolerance in humans. Administration of *E. cloacae* by oral  
544 gavage to mice fed a high-fat diet has previously been shown to induce glucose  
545 intolerance (Fei and Zhao, 2013). A proposed mechanism by which gut microbiota may  
546 influence host metabolism is by escaping immune control and translocating to extra-  
547 intestinal tissues (Amar et al., 2011a; Amar et al., 2011b). While this has been shown  
548 for adipose tissue (Massier et al., 2020; Udayappan et al., 2017), translocation of  
549 intestinal bacteria into the pancreas was also suggested to trigger the influx of immune  
550 cells and islet inflammation (Thomas and Jobin, 2020). In patients undergoing

551 pancreatoduodenectomy, pancreatic fluid contained bacterial DNA, with a similar  
552 composition, density and diversity as bile and jejunal fluid (Rogers et al., 2017),  
553 suggesting direct translocation from the small intestine into pancreatic juice. Others  
554 also suggest a bacteriome (Riquelme et al., 2019) and mycobiome (Aykut et al., 2019)  
555 in pancreatic tissue of cancer patients. In line with these data, we observe a correlation  
556 between systemic antibodies against *E. cloacae* and hyperglycemia, which may  
557 suggest translocation of at least parts of this bacteria to extraintestinal sites.  
558 Nevertheless, translocation of whole bacteria remains rather controversial  
559 (Scheithauer et al., 2020) since there are major challenges related to the sequencing  
560 of small amounts of bacterial DNA in extraintestinal tissues (de Goffau et al., 2019).

561  
562 Heat-inactivated *E. cloacae* induced a detrimental beta-cell phenotype with insulin  
563 hypersecretion, induction of ER stress markers (elevated PI/I ratio), inflammation and  
564 reduced beta-cell insulin content. We show that deletion of TLR5, of which flagellin is  
565 the dominant ligand, on resident islet macrophages protected against the effects of the  
566 flagellum-bearing *E. cloacae*. Flagellum is a virulence factor that enables bacteria to  
567 move within the intestine and even adhere to the intestinal wall, a process called  
568 encroachment (Haiko and Westerlund-Wikström, 2013; Tran et al., 2019). Flagellin  
569 fully reproduced the beta-cell phenotype of *E. cloacae*. A causal role for flagellin was  
570 observed in *E. cloacae* with flagellin knock out, where the effects on inflammation,  
571 hypersecretion and reduced insulin content were strongly diminished. Strengthening  
572 the role of flagellin, mice that were injected with flagellin exhibited a similar beta-cell  
573 phenotype.

574 In line with our previous work (Scheithauer et al., 2021), we observed an increment in  
575 plasma flagellin concentrations following a meal in the current cohort. This indicates  
576 that flagellin, like the widely studied LPS, may translocate after food ingestion.  
577 Importantly, flagellin is able to pass the epithelial barrier (Gewirtz et al., 2001) and is a  
578 potent stimulus of the mucosal immune response (Cullender et al., 2013a; Vijay-Kumar  
579 and Gewirtz, 2009). Plasma flagellin levels also positively correlated with HbA1c in our  
580 cohort, while the meal-related flagellin increment associated with higher C-peptide  
581 release in obese humans with or without diabetes.

582  
583 Finally, to support the hypothesis that systemically disseminated flagellin causes the  
584 observed beta-cell phenotype, we collected pancreatic biopsies from people with T2D



585 undergoing pancreatic surgery for benign lesion. We collected five biopsies of the head  
586 of the pancreas. Recent antibiotics use (<3 months) was an exclusion criterion (**Table**  
587 **S5**). While it was technically not possible to measure flagellin in these biopsies due to  
588 interference of the pancreatic enzymes with the flagellin assay, we observe the  
589 presence of antibodies against flagellin, supporting the notion that the well-  
590 vascularized pancreatic islets are exposed to flagellin (**Figure S7**). A previous study  
591 indicated that a functional immune response is essential to control flagellin expression  
592 bacteria (Cullender et al., 2013a), which seems to be reduced in obese humans (Tran  
593 et al., 2019).

594  
595 We acknowledge a number of limitations of this study. First, although the concept of  
596 translocation of flagellin to the systemic circulation seems to be plausible to explain  
597 beta-cell inflammation (Thomas and Jobin, 2020), we can only speculate if bacterial  
598 flagellin is transported via the blood circulation towards the pancreas. More sensitive  
599 methods are necessary to quantify small amounts of bacterial components such as  
600 flagellin in extra-intestinal tissues (Scheithauer et al., 2020; Tran et al., 2019). Second,  
601 we provide evidence that people with T2Ds have a higher fecal and circulating flagellin  
602 load compared to normoglycemic individuals, with flagellin loads correlating with  
603 hyperglycemia. However, such a correlation does not show causation. Future research  
604 should evaluate whether reducing intestinal or systemic flagellin load will improve beta-  
605 cell function and can reduce diabetes incidence. Third, the concept of insulin  
606 hypersecretion and its linked to low-grade inflammation needs further validation; as  
607 such, studies that show the benefits of reducing insulin hypersecretion are currently  
608 scant. In addition, a moderate inflammatory response has been suggested to be  
609 beneficial in stimulating insulin release (Ying et al., 2020), although the effects of  
610 prolonged inflammation may have different effects.

611  
612 Together, we present a novel pathway linking bacterial flagellin from the Gram-  
613 negative *E. cloacae* in a TLR5-macrophage-dependent manner to beta-cell  
614 inflammation and beta-cell dysfunction, suggesting a new mechanism linking gut  
615 microbiota and T2D prevalence and opening up potential avenues for novel therapies.  
616

617 **Acknowledgments**

618 This study was funded by Diabetes Fonds (Application number: 2015.81.) and Marie  
619 Skłodowska-Curie Actions (Call H2020-MSCA-IF-2015). CBV was supported by CIHR  
620 project grant PJT-165943. M.N. is supported by a personal ZONMW VICI grant 2020  
621 [09150182010020]. B.A.V. is the Children with Intestinal and Liver Disorders (CH.I.L.D)  
622 Foundation Chair in Pediatric Gastroenterology. The HELIUS study is conducted by  
623 the Amsterdam University Medical Centers, location AMC and the Public Health  
624 Service of Amsterdam. Both organisations provided core support for HELIUS. The  
625 HELIUS study is also funded by the Dutch Heart Foundation, the Netherlands  
626 Organization for Health Research and Development (ZonMw), the European Union  
627 (FP-7), and the European Fund for the Integration of non-EU immigrants (EIF). We are  
628 most grateful to the participants of the HELIUS study and the management team,  
629 research nurses, interviewers, research assistants and other staff who have taken part  
630 in gathering the data of this study. The study reported here was additionally supported  
631 by (an) additional grant(s) from Dutch Heart Foundation: 2010T084 (K Stronks),  
632 ZonMw: 200500003 (K Stronks), European Union (FP-7): 278901 (K Stronks),  
633 European Fund for the Integration of non-EU immigrants (EIF): 2013EIF013 (K  
634 Stronks). HH is supported by a Senior Fellowship of the Dutch Diabetes Research  
635 Foundation (2019.82.004).

636

637 **Author contributions**

638 T.P.M.S. performed the experiments and prepared the manuscript. M.W. performed  
639 experiments. S.R.H., G.S., M.S. and D.D. assisted with animal experiments. S.M.,  
640 M.dB., A.vdL. and Ö.A. conducted the BARIA cohort. M.B. and M.D. performed  
641 bioinformatic analyses. W.M.dV., C.B., H.Y. and C.M. provided bacterial cultures.  
642 M.G.B and O.R.B. provided pancreatic biopsies. G.M.D.T., G.J.B. and W.M.V. aided  
643 with the writing. B.J.H.B. conducted the HELIUS cohort. B.A.V., M.N., H.H. and C.B.V.  
644 supervised the project. D.H.R. developed the theory and supervised the project.

645

646 **Conflicts of interest**

647 M.N. and W.M.dV. are in the Scientific Advisory Board of Caelus Pharmaceuticals,  
648 the Netherlands M.N. is in the SAB of Kaleido, USA and W.M.dV. is in the SAB of A-  
649 Mansia, Belgium. However, none of these are directly relevant to the current paper.  
650

651 **METHODS**

652

| REAGENT or RESOURCE                                     | SOURCE                 | IDENTIFIER          |
|---------------------------------------------------------|------------------------|---------------------|
| <b>Antibodies</b>                                       |                        |                     |
| HRP Anti-Human IgG                                      | BD Biosciences         | Cat. #555788        |
| HRP Anti-Human IgM                                      | Abcam                  | Cat. #ab205628      |
| HRP Anti-Human IgA                                      | Abcam                  | Cat. #ab98558       |
| <b>Bacterial and Virus Strains</b>                      |                        |                     |
| <i>Enterobacter cloacae</i> NCDC 279-56                 | DSMZ                   | DSM 30054           |
| <i>Enterobacter cloacae</i> $\Delta$ fliC $\Delta$ fliB | This paper             | N/A                 |
| <i>Faecalibacterium prausnitzii</i> A2-165              | Willem de Vos          | DSM 17677           |
| <i>Bacteroides ovatus</i> 3_8_47FAA                     | Willem de Vos          | NA                  |
| <i>Escherichia coli</i> K12, wild type strain           | DSMZ                   | DSM 5911            |
| <b>Chemicals, Peptides, and Recombinant Proteins</b>    |                        |                     |
| TriPure™ isolation reagent (Roche)                      | Sigma                  | Cat. #11667165001   |
| Luria broth base                                        | Invitrogen             | Cat. #12780052      |
| Nutrient Broth                                          | ThermoFisher           | Cat. #CM0001B       |
| SensiFAST™ cDNA Synthesis Kit                           | Bioline                | Cat. #BIO-65054     |
| Flagellin from <i>Salmonella typhimurium</i>            | Invivogen              | Cat. #tlrl-stfla    |
| LPS from <i>E.coli</i>                                  |                        | Cat. #tlrl-eklps    |
| Clodroante and control liposome                         | Liposome research      | Cat. #CP-005-005    |
| TH1020 (TLR5 inhibitor)                                 | Sigma                  | Cat. #SML1741       |
| High fat diet (60% kcal fat)                            | Research diets         | Cat. #D12492        |
| Hanks balanced salt-solution                            | Gibco                  | Cat. #70011044      |
| Collagenase XI                                          | Sigma                  | Cat. #C7657         |
| <b>Critical Commercial Assays</b>                       |                        |                     |
| QuantiPro™ BCA Assay Kit                                | Sigma                  | Cat. #QPBCA-1KT     |
| ELISA MAX™ Deluxe Set Mouse IL-6                        | BioLegend              | Cat. #431304        |
| IL-6 human uncoated ELISA kit                           | Invitrogen             | Cat. #88-7066-88    |
| QIAamp® Blood Mini Kit                                  | Qiagen                 | Cat. #51104         |
| CellTiter-Glo® Luminescent Cell Viability Assay         | Promega                | Cat. #G7570         |
| Rat/Mouse Proinsulin ELISA                              | Mercodia               | Cat. #10-1232-01    |
| Mouse Ultrasensitive Insulin ELISA                      | ALPCO                  | Cat. #80-INSMSU-E01 |
| <b>Experimental Models: Cell Lines</b>                  |                        |                     |
| HEK-Blue™ hTLR4 cells                                   | InvivoGen              | Cat. #hkb-htrl4     |
| HEK-Blue™ hTLR4 cells                                   | InvivoGen              | Cat. #hkb-htrl5     |
| INS-1E cells                                            | AddexBio               | Cat. #C0018009      |
| <b>Experimental Models: Organisms/Strains</b>           |                        |                     |
| TLR2 KO mice                                            | The Jackson Laboratory | Stock #004650       |
| TLR4 KO mice                                            | The Jackson Laboratory | Stock #007227       |
| TLR5 KO mice                                            | The Jackson Laboratory | Stock #008377       |
| C57BL/6J DIO mice                                       | The Jackson Laboratory | Stock #380050       |
| C57BL/6J mice                                           | Charles River          |                     |

653

654 **LEAD CONTACT AND MATERIALS AVAILABILITY**

655 Further information and requests for resources and reagents should be directed to and  
656 will be fulfilled by the Lead Contact, Daniel H. van Raalte  
657 ([d.vanraalte@amsterdamumc.nl](mailto:d.vanraalte@amsterdamumc.nl)) or Torsten P.M. Scheithauer  
658 ([t.p.scheithauer@amsterdamumc.nl](mailto:t.p.scheithauer@amsterdamumc.nl)). For bacterial mutants, please contact Bruce A.  
659 Vallance ([bvallance@cw.bc.ca](mailto:bvallance@cw.bc.ca))

660

661 **EXPERIMENTAL MODEL AND SUBJECT DETAILS**

662

663 ***Participants***

664 For the current study we included 803 people of Dutch descent with available data on  
665 the gut microbiome from the HELIUS cohort in Amsterdam the Netherlands (Snijder et  
666 al., 2017). For details, regarding the HELIUS study (recruitment, data collection) in  
667 general, and regarding this selection in particular, see Deschasaux et al. (2018). For  
668 microbiome analysis, 150 participants were randomly selected and diabetic  
669 participants (n = 100) were age-BMI-sex matched to healthy non-diabetic controls (n =  
670 50). Diabetic participants were selected according to one of the following criteria (at  
671 least one): self-reported diagnosis of T2D, use of antidiabetic medication, fasting blood  
672 glucose > 7.0 mmol/L and HbA1c > 48 mmol/mol. All participants did not use antibiotics  
673 for the last 3 months.

674 The HELIUS data are owned by the Amsterdam UMC, location AMC in Amsterdam,  
675 The Netherlands. Any researcher can request the data by submitting a proposal to the  
676 HELIUS Executive Board as outlined at  
677 <http://www.heliusstudy.nl/en/researchers/collaboration>, by email:  
678 [heliuscoordinator@amsterdamumc.nl](mailto:heliuscoordinator@amsterdamumc.nl). The HELIUS Executive Board will check  
679 proposals for compatibility with the general objectives, ethical approvals and informed  
680 consent forms of the HELIUS study. There are no other restrictions to obtaining the  
681 data and all data requests will be processed in the same manner.

682 To validate our results in the HELIUS cohort, we included 40 T2D participants and 40  
683 non-diabetic, age, sex and BMI matched controls of the BARIA cohort. For details, see

684 Van Olden et al. (2021). The BARIA Study aims to assess how microbiota and their  
685 metabolites affect transcription in key tissues and clinical outcome in obese subjects  
686 and how baseline anthropometric and metabolic characteristics determine weight loss  
687 and glucose homeostasis after bariatric surgery.

688 The studies were approved by the local Institutional Review Board of the Amsterdam  
689 UMC, location AMC in Amsterdam, the Netherlands, and conducted in accordance with  
690 the Declaration of Helsinki.

691

### 692 **Bacteria**

693 *Enterobacter cloacae* NCDC 279-56 and *Escherichia coli* K12 were cultured in Luria  
694 broth base (Invitrogen, US) and on LB Agar (Invitrogen, US) at 37°C, overnight, before  
695 being used for experiments. *Faecalibacterium prausnitzii* A2-165 in YCFA media and  
696 *Bacteroides ovatus* 3\_8\_47FAA in YZFAA media.

697

### 698 **Animals**

699 C57BL/6J mice were purchased from Charles River (France) and maintained under  
700 specific pathogen free conditions in the S-building of the Amsterdam UMC, location  
701 AMC. TLR2 KO, TLR4 KO, TLR5 KO and C57BL/6J DIO mice were purchased from  
702 Jackson Laboratory (JAX); control animals on C57BL/6J background were used from  
703 JAX facilities instead of Charles River. All animals were socially housed, under a 12h  
704 light/dark cycle until 12-14 weeks and sacrificed for pancreatic islets isolation. Only  
705 male mice were included in this study. Animal work was performed in accordance with  
706 the Central Commission for Animal Experiments (CCD, The Netherlands).

707 **METHOD DETAILS**

708

709 ***Reagents and Antibodies***

710 Luria broth base (Invitrogen, US), LB Agar (Invitrogen, US), sterile PBS (Fresenius  
711 Kabi, Germany), pentobarbital (EUTANASIA), collagenase XI (Sigma-Aldrich, US),  
712 Hanks balanced salt-solution (HBSS w/o calcium and magnesium, Gibco, US), RPMI  
713 1640 (Gibco™, US), fetal bovine serum (FBS, Capricorn, Germany), Penicillin-  
714 Streptomycin (P/S, Gibco, US), bovine serum albumin (BSA, RIA grade, Sigma, US),  
715 RIPA lysis buffer (ThermoScientific™, US), TriPure™ isolation reagent (Roche,  
716 Switzerland), GlycoBlue™ (Invitrogen™, US), UltraPure™ DNase/RNase-Free  
717 Distilled Water (Invitrogen™, US), SensiFAST™ cDNA Synthesis Kit (Bioline, UK),  
718 SensiFAST™ SYBR® No-ROX Kit (Bioline, UK), DMEM (high glucose, Gibco™, US),  
719 β-Mercaptoethanol (Sigma, US), sodium pyruvate (Gibco™, US), HRP Anti-Human  
720 IgG (BD Biosciences, US), HRP Anti-Human IgM (Abcam, UK), HRP Anti-Human IgA  
721 (Abcam, UK), Tween20 (Merck), 1-Step™ Ultra TMB-ELISA Substrate Solution  
722 (ThermoScientific™, US), mouse ultrasensitive insulin ELISA (ALPCO, US),  
723 QuantiPro™ BCA Assay Kit (Sigma, US), ELISA MAX™ Deluxe Set Mouse IL-6  
724 (BioLegend, US), IL-6 human uncoated ELISA kit (Invitrogen™, US), clodronate and  
725 control liposome (Liposome research, The Netherlands), TH1020 (Sigma, US),  
726 CellTiter-Glo® Luminescent Cell Viability Assay (Promega, US), Rat/Mouse Proinsulin  
727 ELISA (Merckodia, SE).

728

729 ***Heat-inactivation of bacteria***

730 The optical density of the bacterial culture was measured at 600 nm (OD600) and  
731 diluted to 1E9 colony forming units (CFUs) per mL. Bacteria were centrifuged at 8000  
732 xg for 5 minutes and resuspended in 1 mL sterile phosphate buffered saline (PBS). All  
733 bacteria were heat-inactivated at 70°C for 30 min and stored at -80°C in small aliquots  
734 for further use.

735

736 **Pancreatic surgery**

737 Individuals who are scheduled for pancreatic surgery (e.g., pylorus-preserving  
738 pancreatoduodenectomy or Whipple's procedure), because of pancreatic carcinoma,  
739 were asked to donate healthy tissue surrounding the tumor. Tissue was harvested  
740 under surgical conditions, snap frozen in liquid nitrogen and stored at -80°C until further  
741 analysis.

742

### 743 ***Pancreatic islet isolation***

744 Mice were anaesthetized with 2.5 mg pentobarbital (diluted in sterile saline) per mouse  
745 and sacrificed via cervical dislocation. After clamping the *Ampulla of Vater*, the  
746 pancreas was injected intraductally with approximately 3 mL of collagenase XI (1000  
747 U/ml) in HBSS (without calcium chloride) and placed in 50 mL tubes with an additional  
748 2 mL of collagenase solution. The pancreas was incubated at 37°C for 13 minutes  
749 followed by gentle shaking to obtain a homogenously dispersed pancreas. Digestion  
750 was stopped with cold HBSS supplemented with 1 mM CaCl<sub>2</sub>. Islets were washed two  
751 times in cold HBSS with CaCl<sub>2</sub> by centrifuging 185 xg for 30 seconds. Next, islets were  
752 filtered through a 70 µm prewetted cell strainer. After flushing two times with 10 mL of  
753 HBSS with CaCl<sub>2</sub>, the strainer was turned upside-down over a Petri dish and rinsed  
754 with 16 mL of islet media (RPMI 1640 with GlutaMAX™ 1x, 10% FBS and P/S 1x) to  
755 collect the islets into the dish. Islets were handpicked under the Nikon SMZ800  
756 microscope into a fresh Petri dish with islet media. Islets were rested overnight to  
757 recover from isolation procedure.

758

### 759 ***Plasmid construction.***

760 Overlap extension PCR (Ho et al., 1989) was used to generate pRE118-pheS-Δ*fliC*  
761 and pRE118-pheS-Δ*fliB* constructs (pRE118-pheS was a gift from Christopher Hayes  
762 of UC Santa Barbara). For pRE118-pheS-Δ*fliC* construct, two PCR fragments were  
763 amplified using *E. cloacae* genomic DNA as the template. Primer pairs used to amplify  
764 the PCR fragments are ec*FliC*-P1 (5'-  
765 GATGATGGTGGTACGCGTGGTACCGGTAGTCGCT-3') plus ec*FliC*-P2 (5'-  
766 GGTTTCTAGGGTTCGGTGCCTTAACACTCA-3'), and ec*FliC*-P3 (5'-  
767 CACCGACCCTAGAAACCCTGTCTCTGCTGCGTTAA-3') plus ec*FliC*-P4 (5'-



768 GACAGTGAGCTCGCATCGTTAACGCGTCTTCACCAA-3'), respectively. This results  
769 in a 789-bp fragment containing the upstream of *fliC* and a 750-bp fragment containing  
770 the downstream of the *fliC*, respectively. These two PCR fragments were then mixed  
771 and used as the template for a secondary PCR (with primer pairs ecFliC-P1 containing  
772 a KpnI restriction enzyme site and ecFliC-P4 containing a SacI restriction enzyme site).  
773 The 16-bp overlapping sequence (underlined) in primers ecFliC-P2 and ecFliC-P3  
774 allows the amplification of a 1,539-bp PCR product. This PCR product was digested  
775 with KpnI and SacI, and directly cloned into the *E. cloacae* suicide vector pRE118-  
776 pheS (Kanr).

777 The pRE118-pheS- $\Delta$ *fliC* construct was generated the same as above. Primer pairs  
778 used to amplify the PCR fragments are FljB-P1 (5'-  
779 GCACGTCTAGAGTGACCTTTATCGTCATCTCACCGT-3') plus FljB-P2 (5'-  
780 GTACCCAGCTGAGTCTGGGATTTGTTTCAGGTTGTT-3'), and FljB-P3 (5'-  
781 AGACTCAGCTGGGTACTGCTGCGTTAATCTGCGTTA-3') plus FljB-P4 (5'-  
782 GACAGTGAGCTCGTACAGCTATTCGCTGCATAACGA-3'), respectively. This results  
783 in a 955-bp fragment containing the upstream of *fljB* and a 950-bp fragment containing  
784 the downstream of the *fljB*, respectively. These two PCR fragments were then mixed  
785 and used as the template for a secondary PCR (with primer pairs FljB-P1 containing a  
786 XbaI restriction enzyme site and FljB-P4 containing a SacI restriction enzyme site).  
787 The 16-bp overlapping sequence (underlined) in primers FljB-P2 and FljB-P3 allows  
788 the amplification of a 1,905-bp PCR product. This PCR product was digested with XbaI  
789 and SacI, and directly cloned into the *E. cloacae* suicide vector pRE118-pheS.

790

### 791 **Generation of *E. cloacae* mutant strains**

792 pRE118-pheS- $\Delta$ *fliC* and pRE118-pheS- $\Delta$ *fljB* constructs were transformed into *E. coli*  
793 MFD( $\lambda$  pir). *E. coli* MFD( $\lambda$  pir) carrying these constructs and WT *E. cloacae* were grown  
794 overnight in LB, and then mixed at a ratio of 4:1 (donor vs recipient strains). To make  
795  $\square$ fljB $\square$ fliC, *E. coli* MFD( $\lambda$  pir) carrying pRE118-pheS- $\Delta$ *fljB* and  $\Delta$ *fliC* were grown  
796 overnight in LB, and then mixed at a ratio of 4:1. Fifty microliter of the mixture was  
797 spotted onto LB agar plate containing diaminopimelic acid (DAP, 0.3 mM), and  
798 incubated at 37°C overnight. This was followed by scaping the cell mixtures in PBS

799 and plating onto LB agar containing streptomycin (100 µg/ml) and kanamycin (50  
800 µg/ml). The resulting single-crossover mutants were grown statically in LB at 37°C  
801 overnight, and further counter selected on M9 minimal medium agar plates containing  
802 0.4% (w/v) glucose and 0.1% (w/v) p-chlor-o-phenylalanine (Ting et al., 2020).  
803 Kanamycin sensitive colonies were screened by colony PCR. The  $\Delta fliC$  deletion  
804 mutant was confirmed by PCR with primers ecFliC-check-F (5'-  
805 GCGTTTCTGATGGCGTTCTGAA-3') and ecFliC-check-R (5'-  
806 GCTCGAACTTGTTTCATCCCGATT-3'). The predicted size of WT and mutant bands is  
807 1201-bp and 362-bp, respectively. The  $\Delta fljB$  deletion mutant was confirmed by PCR  
808 with primers FljB-check-F (5'-GCAGAACAACCTGAACAAATCCCA-3') and FljB-  
809 check-R (5'-GACACGTTTACGCCGGTTCCTACTAT-3'). The predicted size of WT and  
810 mutant bands is 1811-bp and 387-bp, respectively.

811

#### 812 ***Confirming mutants with a swimming motility assay.***

813 WT and mutant *E. cloacae* strains ( $\Delta fljB$ ,  $\Delta fliC$ ,  $\Delta fljB\Delta fliC$ ) were grown statically in 2 µl  
814 of LB at 30 °C for 18 h. Two microliter of these cultures were spotted onto semi-solid  
815 nutrient broth (BD) agar plates containing 0.3 % agar. After incubating the plates at 37  
816 °C for 4 h, pictures showing the swimming motility were taken (**Figure S8**).

817

#### 818 ***Glucose stimulated insulin secretion***

819 Pancreatic islets or  $\beta$ -cell lines (see seeding below) were washed in a 12 well plate 2x  
820 with 500 uL low glucose Krebs-Ringer buffer (KRB; 132 mM NaCl, 5 mM KCl, 1 mM  
821  $KH_2PO_4$ , 1 mM  $MgSO_4$ , 2.5 mM  $CaCl_2$ , 5 mM  $NaHCO_3$ , 10 mM HEPES, 0.25% BSA,  
822 1.64 mM glucose) and starved in 500 uL low glucose KRB for 1 hour. Islets were split  
823 into 10 islets per well in a 12 well plate (triplicates) and incubated for 1 hours in 500 uL  
824 low glucose KRB. The same islets were transferred into 500 uL high glucose KRB (16.4  
825 mM) for 1 hour. Finally, islets were washed 2x with 1 mL PBS and lysed with 150 uL  
826 RIPA buffer. Islet lysate was spun at 14.000 xg for 10 min at 4°C and the supernatant  
827 was stored at -20°C until further use.

828

829 ***DNA isolation***

830 Fecal DNA was extracted from 150 mg fecal material and the sorted fractions using a  
831 repeated bead beating protocol (method 5) (Costea et al., 2017). DNA was purified  
832 using Maxwell RSC Whole Blood DNA Kit. 16S rRNA gene amplicons were generated  
833 as described below.

834

835 ***RNA isolation and cDNA synthesis***

836 RNA was isolated with TriPure™ isolation reagent (Roche). Cells were separated from  
837 the culture media and 300 uL TriPure™ was added. After lysis, 60 uL chloroform was  
838 added, the mixture was vigorously shaken for 15 seconds and incubated for 3 minutes  
839 at room temperature. Next, samples were spun for 15 minutes at 12.000 xg (4°C) and  
840 the aqueous phase was mixed with 190 uL isopropanol with 0.44 uL GlycoBlue™. After  
841 an overnight incubation at -20°C, samples were spun at 12.000 xg for 10 minutes (4°C)  
842 and the pellet was 2x washed with 1 mL of 75% ethanol (7.500 xg, 5 minutes, 4°C).  
843 Next, the pellet was dried at room temperature for 10 minutes, 18 uL RNase free H<sub>2</sub>O  
844 was added and incubated at 56°C for 10 minutes. RNA concentration was measured  
845 with Nanodrop. cDNA synthesizes was performed with SensiFAST™ cDNA Synthesis  
846 Kit according to manufactures instructions.

847

848 ***PCRs***

849 Gene expression was measured *via* real time quantitative PCR (RT-qPCR) with the  
850 aid of PCR machine (BioRad, US). SensiFAST™ SYBR® No-ROX Kit was used  
851 according to manufactures instructions. For each well, 7.5 ng cDNA and 1 µM primer  
852 mix were used in a 10 uL PCR mix. For primers see **Table S6**. Temperatures are used  
853 as following, if not stated differently: 95°C for 10 minutes, 40 cycles of 95°C for 15  
854 seconds and 60°C for 30 seconds with a plate reading, followed by a melt curve with  
855 increment of 0.5°C every 5 seconds starting from 65°C to 95°C.

856 Fecal bacteria were measured via quantitative PCR with the aid of PCR machine  
857 (BioRad, US). SensiFAST™ SYBR® No-ROX Kit was used according to manufactures  
858 instructions. For each well, 10 ng genomic DNA and 300 nM primer mix were used in

859 a 10 uL PCR mix. For primers see **Table S6**. For total bacterial in feces, EUBAC  
860 primers and temperature settings were used as stated (Nadkarni et al., 2002). For  
861 Enterobacteriaceae detection, En-lsu3 was used as described (Matsuda et al., 2007).  
862 Primers for *Enterobacter cloacae* was designed for the V3V4 regions. Temperatures  
863 as described above were used. Standard amplicons were made with genomic DNA  
864 from *E.coli* or *E. cloacae* and *Taq* DNA Polymerase (Qiagen, Germany) according to  
865 manufactures instructions. Amplicons were cleaned with QIAquick PCR purification Kit  
866 (Qiagen, Germany). Copy numbers were calculated according to the standard curve.

867

### 868 **Cell lines**

869 HEK-Blue™ hTLR5 cells were used according to manufactures instructions. For  
870 flagellin detection in the blood circulation, 20 uL serum was used per well (96 well  
871 plate) and mixed with 180 uL of 1.4x1E5 cells/mL in detection media. Cells were  
872 incubated for 16 hours and the supernatant was read at OD620. INS-1E cells were  
873 cultured in RPMI 1640 media (5% FBS, 1x P/S, 1x HEPES, 50 μM β-mercaptoethanol,  
874 1x sodium pyruvate) and passaged with 0.25% Trypsin-EDTA. Cells were seeded in a  
875 12 well plate at 75.000 cells/mL, rested overnight and incubated with heat-inactivated  
876 bacteria for 72 hours.

877

### 878 **Antibody analysis**

879 Bacteria were grown overnight and the optical density was measured at OD600.  
880 Bacteria were diluted to have 1E9 CFUs/mL and washed with 1 mL sterile PBS (8000  
881 xg, 5 minutes, 4°C). Bacteria were sonicated on ice at 30% amplitude for 20 x 30  
882 seconds cycles with 60 seconds intervals. Nunc™ MicroWell™ 96-well microtiterplates  
883 (ThermoScientific™, US) were coated with 200.000 sonicated bacteria per well (100  
884 uL) overnight at 4°C. Plates were washed 3x with 300 uL per well of PBS and blocked  
885 with 150 uL PBS with 1% BSA for 2 hours at room temperature. Plates were washed  
886 again with PBS, 100 uL of 250x diluted serum samples (PBS/BSA) was added and  
887 incubated for 4 hours at room temperature. Plates were washed 3x with PBS with  
888 0.05% Tween20 and 100 uL of secondary antibody (2000x diluted HRP anti-Human  
889 IgG; 50.000x diluted HRP anti-human IgM; 20.000x diluted HRP anti-human IgA; in

890 PBS/Tween20) was added for 2 hours at room temperature. Plates were washed with  
891 PBS again and 100 uL of TMB was added for 15 minutes. The reaction was stopped  
892 with 50 uL of 0.5M HCl and read at OD450.

893 Pancreatic biopsies were 10x diluted according to tissue weight and homogenized in  
894 ultrapure water (Invitrogen, US) with the aid of a sterile metal bead. The homogenate  
895 was spun Nunc™ MicroWell™ 96-well microtiterplates (ThermoScientific™, US) were  
896 coated overnight (4°C) with 100 ng per well of flagellin from *Salmonella typhimurium*  
897 (Invivogen, US). The plates was washed 3x with 300 uL PBS/Tween20. Afterwards,  
898 100 uL of homogenized pancreas was added and incubated for 1h at 37°C. The plates  
899 was washed 3x with 300 uL PBS/Tween20. Secondary antibodies and TMB were  
900 added as described above.

901

## 902 **ELISA**

903 Insulin was measured in low glucose KRB, high glucose KRB and cell lysate from GSIS  
904 experiments with ALPCO mouse ultrasensitive insulin ELISA according to  
905 manufactures instructions. Concentrations were normalized to total protein content  
906 measured via QuantiPro™ BCA Assay Kit. Proinsulin ELISA (Mercodia) was  
907 performed according to manufactures instructions. IL-6 concentrations were measured  
908 in cell supernatants via ELISA MAX™ Deluxe Set Mouse IL-6 and IL-6 human  
909 uncoated ELISA kit according to manufactures instructions.

910

## 911 **Monocyte isolation**

912 PBMCs were isolated with Lymphoprep (GE Healthcare) and CD14 MACS beads  
913 (Miltenyi) according to manufactures instructions.

914

## 915 **Macrophage depletion**

916 Pancreatic islet macrophages were depleted with Clodronate-liposome. Islets were  
917 isolated and rested for 3 hours. Islets were picked in a small petri dish (40-70 islets per  
918 dish) and treated with either clodronate or control liposome for 48h (1 in 5 diluted in

919 islet media). Islets were washed 3x with 2 mL complete media and picked in fresh  
920 media.

921

### 922 ***Library preparation and sequencing***

923 Library preparation and sequencing was performed at the Wallenberg Laboratory  
924 (Sahlgrenska University of Gothenburg, Sweden). Fecal microbiome composition was  
925 profiled by sequencing the V4 region of the 16S rRNA gene on an Illumina MiSeq  
926 instrument (Illumina RTA v1.17.28; MCS v2.5) with 515F and 806R primers designed  
927 for dual indexing (Kozich et al., 2013) and the V2 Illumina kit (2x250 bp paired-end  
928 reads). 16S rRNA genes from each sample were amplified in duplicate reactions in  
929 volumes of 25  $\mu$ L containing 1x Five Prime Hot Master Mix (5 PRIME GmbH), 200 nM  
930 of each primer, 0.4 mg/ml BSA, 5% DMSO and 20 ng of genomic DNA. PCR was  
931 carried out under the following conditions: initial denaturation for 47 min at 94°C,  
932 followed by 25 cycles of denaturation for 45 sec at 94°C, annealing for 60 sec at 52°C  
933 and elongation for 90 sec at 72°C, and a final elongation step for 10 min at 72°C.  
934 Duplicates were combined, purified with the NucleoSpin Gel and PCR Clean-up kit  
935 (Macherey-Nagel) and quantified using the Quant-iT PicoGreen dsDNA kit (Invitrogen).  
936 Purified PCR products were diluted to 10 ng/ $\mu$ L and pooled in equal amounts. The  
937 pooled amplicons were purified again using Ampure magnetic purification beads  
938 (Agencourt) to remove short amplification products; for negative controls, see  
939 Deschasaux et al. (2018). Libraries for sequencing were prepared by mixing the pooled  
940 amplicons with PhiX control DNA purchased from Illumina. The input DNA had a  
941 concentration of 3 pM and contained 15% PhiX and resulted in the generation of about  
942 700K clusters/mm<sup>2</sup> and an overall percentage of bases with quality score higher than  
943 30 (Q30) higher than 70%.

944

### 945 ***Bioinformatic pipeline***

946 USEARCH (v11.0.667\_i86linux64) was used to process the raw sequencing reads.  
947 For paired-end merging, we used 30 max. allowed differences in the overlapping  
948 region (“maxdiffs”) for the merging step (using the “fastq\_mergepairs” command) and  
949 max. 1 expected errors (“fastq\_maxee”) as a quality filter threshold (using the

950 “fastq\_filter” command). Expected error-based read quality filtering is described in  
951 detail in Edgar et al. 2015. After merging paired-end reads and quality filtering,  
952 remaining contigs were dereplicated and unique sequenced were denoised using the  
953 UNOISE3 algorithm in order to obtain Amplicon Sequence Variants (ASVs). All merged  
954 reads were subsequently mapped against the resulting ASVs to produce an ASV table.  
955 ASVs not matching expected amplicon length were filtered out (i.e. ASV sequences  
956 longer than 260 bp or shorter than 250 bp). Taxonomy was assigned with the  
957 ‘assignTaxonomy’ function from the ‘dada2’ R package (v 1.12.1) and the SILVA (v.  
958 132) reference database. ASVs sequences were then aligned using MAFFT (v.7.427)  
959 using the auto settings. A phylogenetic tree was constructed from the resulting multiple  
960 sequence alignment with FastTree (v.2.1.11 Double Precision) using a generalized  
961 time-reversible model (‘-gtr’). The AVS table, taxonomy and tree were integrated using  
962 the ‘phyloseq’ R package (v.1.28.0). The ASV table was rarefied to 14932 counts per  
963 sample with vegan v2.5-6. Of 6056 sequenced samples, 24 had insufficient counts  
964 (<5000 counts per sample) and were excluded at the rarefaction stage. The final  
965 dataset thus contained 6032 samples and 22532 ASVs. Functional composition was  
966 inferred using PICRUSt2 (2.2.0b).

967

### 968 ***Cell viability***

969 Cell viability of was measured with CellTiter-Glo® Luminescent Cell Viability Assay  
970 (Promega) according to manufactures instructions. 10 size matched islets were used  
971 per replicate with 5 replicates per experiment. Luminescence was read with Promega  
972 GLOMAX™ multi detection system.

973

### 974 ***Statistical analysis***

975 Data were checked for normality with the Shapiro–Wilk test. Paired or unpaired t-test  
976 was performed for normal continuous variables and the Wilcoxon signed rank test or  
977 Mann-Whitney for other variables. Spearman correlation was used for all correlation  
978 analysis. 2-way ANOVA with Šidák multiple comparison was used for glucose and  
979 insulin tolerance tests. Statistical analyses were performed using Prism, version 8.3.0  
980 (GraphPad Software, US). Data are provided as mean with SEM . P-values < 0.05

981 were considered statistically significant. All authors had access to the study data and  
982 reviewed and approved the final manuscript.



983 **Supplementary information**

984

985 **Table S1: Patient characteristics of the Dutch participants of the HELIUS cohort**  
 986 **(complementary to Figure 1A).**

987 Dutch origin people of the HELIUS cohort are shown. Data shown are mean  $\pm$  SD for  
 988 patient characteristics. Mann-Whitney test was used for statistical significance.  
 989 Abbreviations: ND, no diabetes; T2D, Type 2 diabetes; HbA1c, glycated hemoglobin.

|                                      | ND              | T2D            | p value |
|--------------------------------------|-----------------|----------------|---------|
| n                                    | 712             | 91             | n.d.    |
| Sex (% female)                       | 57              | 34             | <0.0001 |
| Age (years)                          | 45.8 $\pm$ 13.0 | 61.7 $\pm$ 5.9 | <0.0001 |
| Body mass index (kg/m <sup>2</sup> ) | 23.8 $\pm$ 3.5  | 29.2 $\pm$ 4.7 | <0.0001 |
| HbA1c (mmol/mol)                     | 34.3 $\pm$ 2.7  | 46.9 $\pm$ 8.2 | <0.0001 |

990

991 **Table S2: Gut microbiota composition of HELIUS cohort (complementary to**  
 992 **Figure 1A).**

993 Only a subset of Dutch origin people of the HELIUS cohort are shown. The 16S rRNA  
 994 of the fecal microbiota was sequenced via miSeq (family level). Data shown are  
 995 median. Abbreviations: ND, no diabetes; T2D, Type 2 diabetes.

| Bacterial family                       | ND (n = 712) | T2D (n = 91) |
|----------------------------------------|--------------|--------------|
| Bacteroidales_Rikenellaceae            | 1.62         | 1.22         |
| Bacteroidales_Barnesiellaceae          | 0.44         | 0.31         |
| Bacteroidales_Muribaculaceae           | 0.54         | 0.67         |
| Bacteroidales_Prevotellaceae           | 9.25         | 10.30        |
| Bacteroidales_Bacteroidaceae           | 7.90         | 8.20         |
| Bacteroidales_Tannerellaceae           | 0.71         | 0.78         |
| Clostridiales_Lachnospiraceae          | 30.10        | 31.69        |
| Clostridiales_Peptostreptococcaceae    | 1.08         | 0.71         |
| Verrucomicrobiales_Akkermansiaceae     | 0.83         | 0.55         |
| Desulfovibrionales_Desulfovibrionaceae | 0.39         | 0.60         |
| Betaproteobacteriales_Burkholderiaceae | 0.68         | 0.74         |
| Enterobacteriales_Enterobacteriaceae   | 0.35         | 1.08         |
| Bifidobacteriales_Bifidobacteriaceae   | 2.34         | 1.57         |
| Coriobacteriales_Eggerthellaceae       | 0.62         | 0.62         |

|                                        |       |       |
|----------------------------------------|-------|-------|
| Coriobacteriales_Coriobacteriaceae     | 1.24  | 1.55  |
| Selenomonadales_Veillonellaceae        | 1.74  | 1.92  |
| Selenomonadales_Acidaminococcaceae     | 0.88  | 1.16  |
| Erysipelotrichales_Erysipelotrichaceae | 2.06  | 2.66  |
| Lactobacillales_Streptococcaceae       | 0.52  | 0.96  |
| Clostridiales_Christensenellaceae      | 1.95  | 1.68  |
| Clostridiales_Clostridiaceae_1         | 0.68  | 0.44  |
| Clostridiales_Ruminococcaceae          | 30.35 | 27.28 |
| Other                                  | 1.97  | 2.11  |

996

997 **Table S3. Characteristics of selected participants from HELIUS cohort.**

998 Participants were randomly selected from the HELIUS cohort. People with Type 2  
 999 diabetes (T2D) were matched to controls without T2D according to age, sex and body  
 1000 mass index (BMI). Data shown are mean  $\pm$  SD. Unpaired t-test was used for age and  
 1001 BMI. Mann Whitney test for fasting glucose and HbA1c. Abbreviations: n.d., not  
 1002 determined; BMI, body mass index; HbA1c, glycated hemoglobin.

|                          | ND (n = 50)     | T2D (n = 100)   | p-value |
|--------------------------|-----------------|-----------------|---------|
| Age (years)              | 57.2 $\pm$ 6.8  | 56.8 $\pm$ 6.7  | 0.7440  |
| Female (%)               | 62              | 62              | 1.0000  |
| BMI (kg/m <sup>2</sup> ) | 29.7 $\pm$ 4.4  | 29.8 $\pm$ 5.0  | 0.9673  |
| Fasting glucose (mmol/L) | 5.35 $\pm$ 0.56 | 7.13 $\pm$ 1.85 | <0.0001 |
| HbA1c (mmols/mol)        | 40.0 $\pm$ 4.2  | 54.5 $\pm$ 15.2 | <0.0001 |

1003

1004 **Table S4. Characteristics of selected participants from BARIA cohort.**

1005 Participants were randomly selected from BARIA cohort. People with Type 2 diabetes  
 1006 (T2D) were matched to controls without T2D according to age, sex and body mass  
 1007 index (BMI). Baseline samples were used before bariatric surgery. Data shown are  
 1008 mean  $\pm$  SD. Unpaired t-test was used. Abbreviations: n.d., not determined; BMI, body  
 1009 mass index; HbA1c, Glycated hemoglobin; OD, optical density.

|                          | ND (n = 40)    | T2D (n = 40)    | p-value |
|--------------------------|----------------|-----------------|---------|
| Age (years)              | 49.2 $\pm$ 9.9 | 49.4 $\pm$ 10.2 | 0.9468  |
| Female (%)               | 65             | 65              | 1.000   |
| BMI (kg/m <sup>2</sup> ) | 39.4 $\pm$ 3.4 | 39.2 $\pm$ 4.7  | 0.8666  |
| Fasting glucose (mmol/L) | 5.7 $\pm$ 0.8  | 7.3 $\pm$ 1.6   | <0.0001 |

|                    |             |               |         |
|--------------------|-------------|---------------|---------|
| HbA1c (%)          | 5.7 ± 0.4   | 7.3 ± 1.1     | <0.0001 |
| C-peptide (nmol/L) | 0.92 ± 0.3  | 0.94 ± 0.4    | 0.7463  |
| Insulin (pmol/L)   | 91.3 ± 46.0 | 189.1 ± 239.5 | 0.0144  |

1010

1011 **Table S5. Patient characteristics of diabetic individuals for human pancreatic biopsy**  
 1012 **analysis**

|                           | <b>T2D (n = 5)</b> |
|---------------------------|--------------------|
| Age (years)               | 49.4 ± 10.2        |
| Sex (M/F)                 | 3/2                |
| BMI (kg/m <sup>2</sup> )  | 27.1 ± 3.0         |
| HbA1c (%)                 | 7.8 ± 1.4          |
| Diabetes duration (years) | 9 ± 5              |

1013

1014 **Table S6. Primer sequences used in this manuscript (both in 5'3' direction).**

| Name          | Species                         | Forward                       | Reverse                          | Ref.                 |
|---------------|---------------------------------|-------------------------------|----------------------------------|----------------------|
| Eclo_V<br>3V4 | <i>Enterobacter<br/>cloacae</i> | CAGCAATTGACGTTACCC<br>GC      | CAGCCTGCCAGTTTCGAAT<br>G         | This<br>study        |
| En-lsu3       | Enterobacteri<br>aceae          | TGCCGTAACCTTCGGGAGA<br>AGG    | TCAAGGCTCAATGTTTCAGT<br>GTC      | PMID<br>17071<br>791 |
| EUBAC         | Bacteria                        | TCCTACGGGAGGCAGCAG<br>T       | GGACTIONCAGGGTATCTAA<br>TCCTGTT  | PMID<br>11782<br>518 |
| RPLP0         | Human                           | ACGGGTACAAACGAGTCC<br>TG      | GCCTTGACCTTTTCAGCAA<br>G         | This<br>study        |
| RPLP0         | Rat                             | GAACATCTCCCCCTTCTC<br>CTTC    | ATTGCGGACACCCTCTAGG<br>AA        | This<br>study        |
| Rps18         | Mouse                           | CAC TTT TGG GGC CTT<br>CGT G  | GCA AAG GCC CAG AGA<br>CTC ATT   | This<br>study        |
| NLRP3         | Mouse                           | AGA GCC TAC AGT TGG<br>GTG AA | CTT CCA ACG CCT ACC<br>AGG AAA T | This<br>study        |

|       |       |                                  |                                |               |
|-------|-------|----------------------------------|--------------------------------|---------------|
| NLRP3 | Human | CAGAACCTGGGGTTGTCT<br>GAA        | GAAGGCTCAAAGACGACG<br>GT       | This<br>study |
| MafA  | Human | GAGAGCGAGAAGTGCCAA<br>CT         | CTTGACAGGTCCCGCTCT<br>TT       | This<br>study |
| MafA  | Mouse | CAA GGA GGA GGT CAT<br>CCG AC    | TCT CCA GAA TGT GCC<br>GCT G   | This<br>study |
| MafA  | Rat   | GCACCCGACTTCTTTCTGT<br>GA        | GCCTCAGAGTCCGAACCG<br>A        | This<br>study |
| PDX1  | Human | AAA GCT CAC GCG TGG<br>AAA G     | GGC CGT GAG ATG TAC<br>TTG TTG | This<br>study |
| PDX1  | Mouse | CAG TGG GCA GGA GGT<br>GCT TA    | GGG CCG GGA GAT GTA<br>TTT GTT | This<br>study |
| PDX1  | Rat   | TTCATCTCCCTTTCCCGTG<br>G         | GTGTAGGCTGTACGGGTC<br>CT       | This<br>study |
| INS1  | Mouse | GAC CAT CAG CAA GCA<br>GGT CAT T | GAC AAA AGC CTG GGT<br>GGG TT  | This<br>study |
| INS1  | Rat   | CACACCCAAGTCCCGTCG<br>T          | AACCTCCAGTGCCAAGGTC<br>TG      | This<br>study |
| INS   | Human | TCT ACC TAG TGT GCG<br>GGG AA    | TCC ACC TGC CCC ACC TG         | This<br>study |
| INS2  | Mouse | AGG CTC TCT ACC TGG<br>TGT GT    | TCT GAA GGT CAC CTG<br>CTC CC  | This<br>study |
| INS2  | Rat   | AACCATCAGCAAGCAGGT<br>CA         | TCCACCAAGTGAGAACCAC<br>A       | This<br>study |
| Glut2 | Mouse | AATGGTCGCCTCATTCTTT<br>G         | AGCCAACATTGCTTTGATC<br>C       | This<br>study |
| Glut2 | Rat   | TTGCTCCAACCACACTCA<br>GG         | CTGAGGCCAGCAATCTGA<br>CT       | This<br>study |

|               |       |                               |                                   |               |
|---------------|-------|-------------------------------|-----------------------------------|---------------|
| Glut2         | Human | TGCCCACTCACACAAGA<br>CC       | AACTGGAAGGAACCCAGC<br>AC          | This<br>study |
| F4/80         | Mouse | TGACAACCAGACGGCTTG<br>TG      | GCAGGCGAGGAAAAGATA<br>GTGT        | This<br>study |
| CD68          | Human | CCC CAA CAA AAC CAA<br>GGT CC | GGA GGT CCT GCA TGA<br>ATC CAA A  | This<br>study |
| TNF- $\alpha$ | Mouse | CTGTAGCCCACGTCGTAG<br>C       | TTGAGATCCATGCCGTTG                | This<br>study |
| TNF- $\alpha$ | Human | CAGCCTCTTCTCCTTCCTG<br>AT     | GCCAGAGGGCTGATTAGA<br>GA          | This<br>study |
| IL-1 $\beta$  | Mouse | GCAACTGTTCTGAACTC<br>AACT     | ATCTTTTGGGGTCCGTCAA<br>CT         | This<br>study |
| IL-1 $\beta$  | Rat   | TTTCGACAGTGAGGAGAA<br>TGACC   | CTGGACAGCCCAAGTCAA<br>GG          | This<br>study |
| IL-1 $\beta$  | Human | GCT GAG GAA GAT GCT<br>GGT TC | GTG ATC GTA CAG GTG<br>CAT CG     | This<br>study |
| IL-6          | Mouse | TCGTGGAATGAGAAAAG<br>AGTTGTG  | TCCAGTTTGGTAGCATCCA<br>TCAT       | This<br>study |
| TLR2          | Mouse | TAGGGGCTTCACTTCTCT<br>GC      | CCAAAGAGCTCGTAGCATC<br>C          | This<br>study |
| TLR5          | Mouse | CTGGAGCCGAGTGAGGTC            | CGGCAAGCATTGTTCTCC                | This<br>study |
| TLR5          | Human | GAC ACA ATC TCG GCT<br>GAC TG | TCA GGA ACA TGA ACA<br>TCA ATC TG | This<br>study |
| TLR5          | Rat   | GACCCAGTATGCTCGCTT<br>GA      | GATGGGGCAGTCCCTGAA<br>AA          | This<br>study |

1015

1016

1017

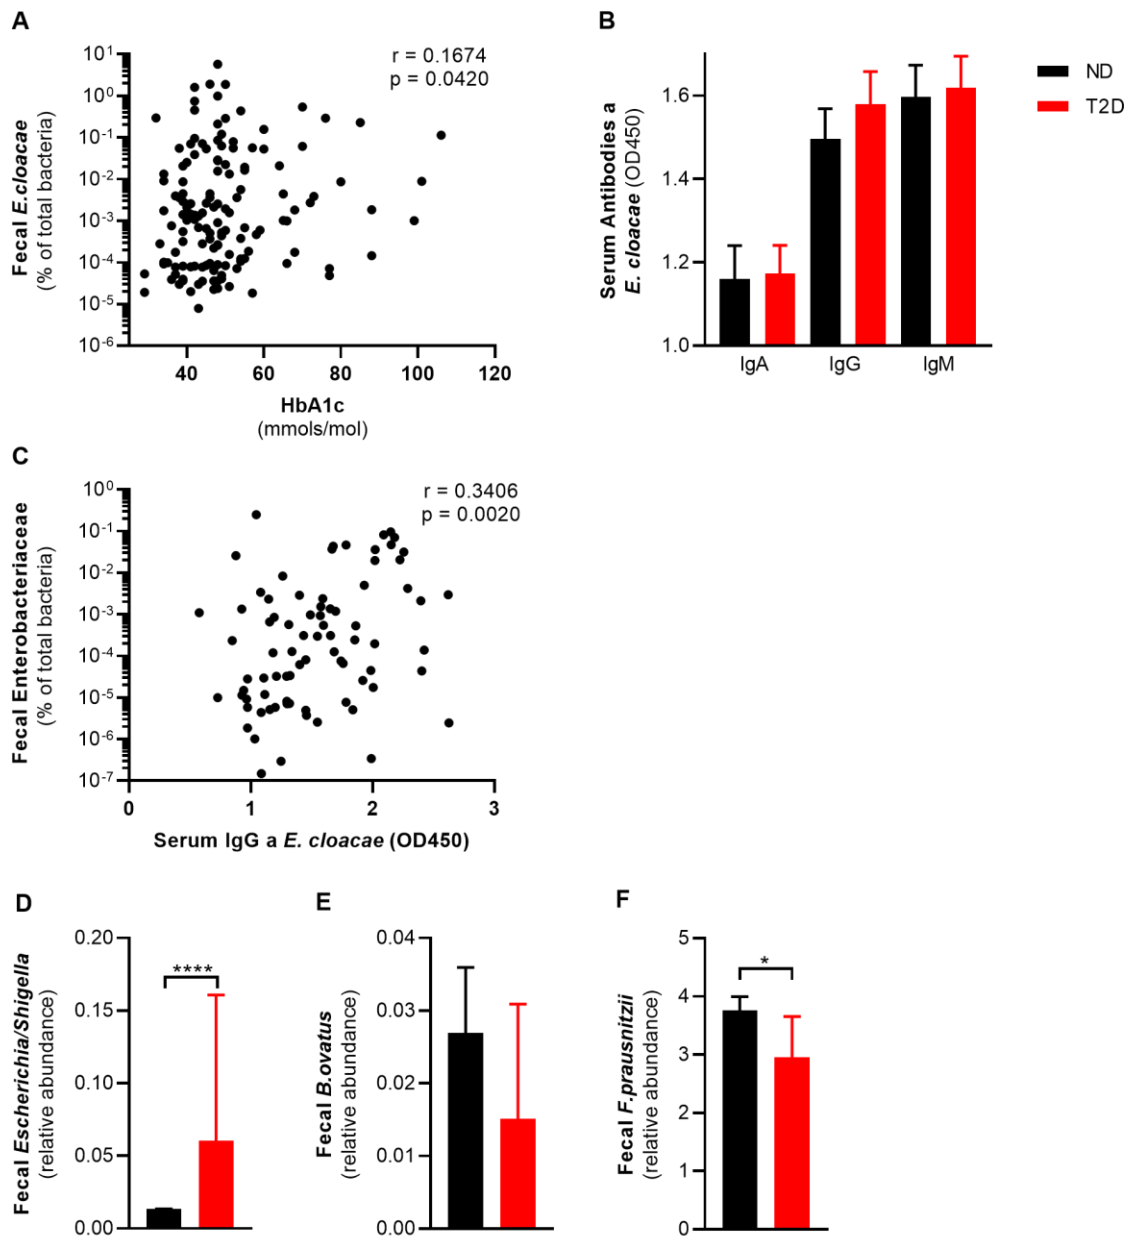

1018

1019 **Figure S1. Fecal pathogens are associated with glucose intolerance.**

1020 (A) Fecal *Enterobacter cloacae* positively correlates with glucose marker HbA1c in a  
1021 subset of the HELIUS cohort (N = 150).

1022 (B) Serum antibodies against *E. cloacae* are not different between ND and T2D in  
1023 subset of the HELIUS cohort (N = 80).

1024 (C) Serum IgG anti *E. cloacae* positively correlates with fecal Enterobacteriaceae (N =  
1025 80, Spearman correlation).

1026 (D) Fecal *Escherichia* is increased in T2D (HELIUS cohort, N = 803)

1027 (E) Fecal *Bacteroides ovatus* is non-significantly decreased in T2D (HELIUS cohort, N  
1028 = 803)

1029 (F) Fecal *Fecalibacterium prausnitzii* is decreased in T2D (HELIUS cohort, N = 803)

1030 Data shown are mean  $\pm$  SEM, except for gut microbiota (median with 95% confidence  
1031 interval). Spearman correlation (A, C) and Mann Whitney test (D, F) was used:  
1032 \* $p < 0.05$ , \*\*\* $p < 0.0001$ . Abbreviations: ND, no diabetes; T2D, Type 2 diabetes; IgG,  
1033 Immunoglobulin G; HbA1c, glycated hemoglobin.

1034

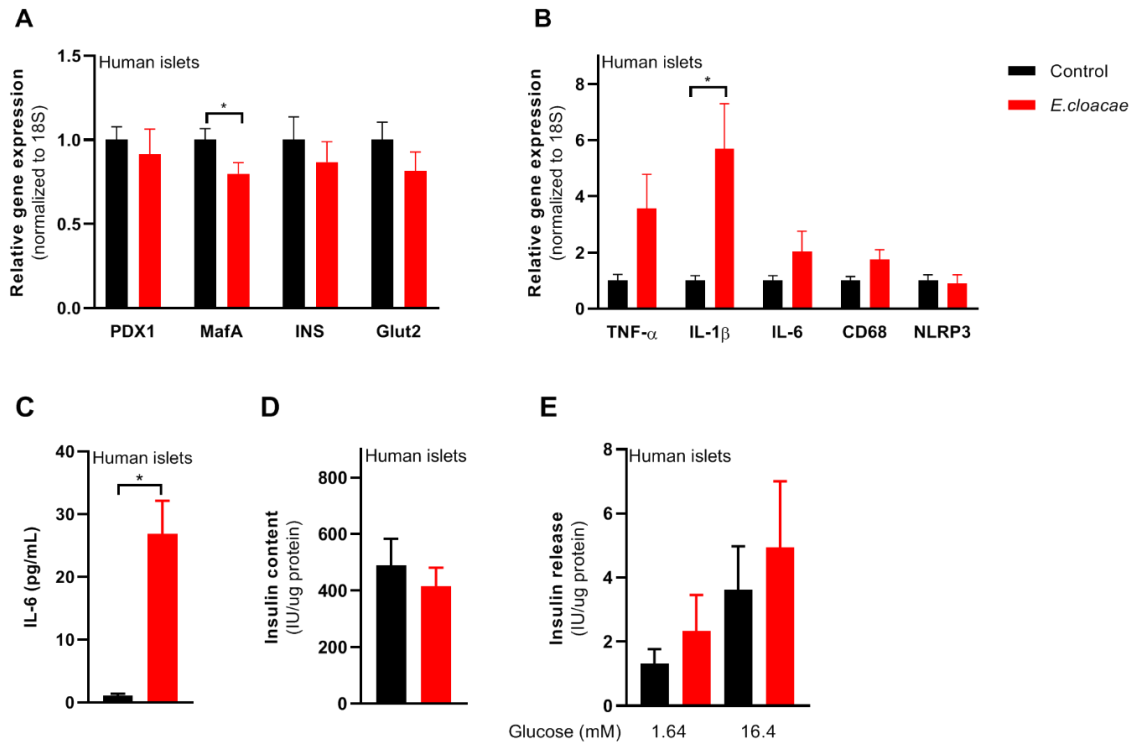

1035

1036 **Figure S2. *E. cloacae* induces beta cell inflammation and partially dysfunction in**  
1037 **human islets.**

1038 Human islets were ordered from ProdoLabs and treated with *E. cloacae* (1E6  
1039 CFUs/mL) for 72h.

1040 (A) *E. cloacae* reduces beta cell marker expression in human islets.

1041 (B) *E. cloacae* induces beta cell inflammation in human islets.

1042 (C) *E. cloacae* induces IL-6 release from human islets.

1043 (D) *E. cloacae* slightly reduces insulin content in human islets.

1044 (E) *E. cloacae* slightly induces insulin hypersecretion in human islets.

1045 Data shown are mean  $\pm$  SEM. Unpaired t-test was used for statistical analysis:  
1046 \* $p < 0.05$ , \*\* $p < 0.01$ , \*\*\* $p < 0.001$ , \*\*\*\* $p < 0.0001$ .

1047 Abbreviations: INS1 and INS2, insulin 1 and 2; NLRP3, NACHT, LRR and PYD  
1048 domains-containing protein 3; IL-1 $\beta$ , Interleukin 1 beta; IL-6, Interleukin 6; TLR, toll like  
1049 receptor.

1050



1051

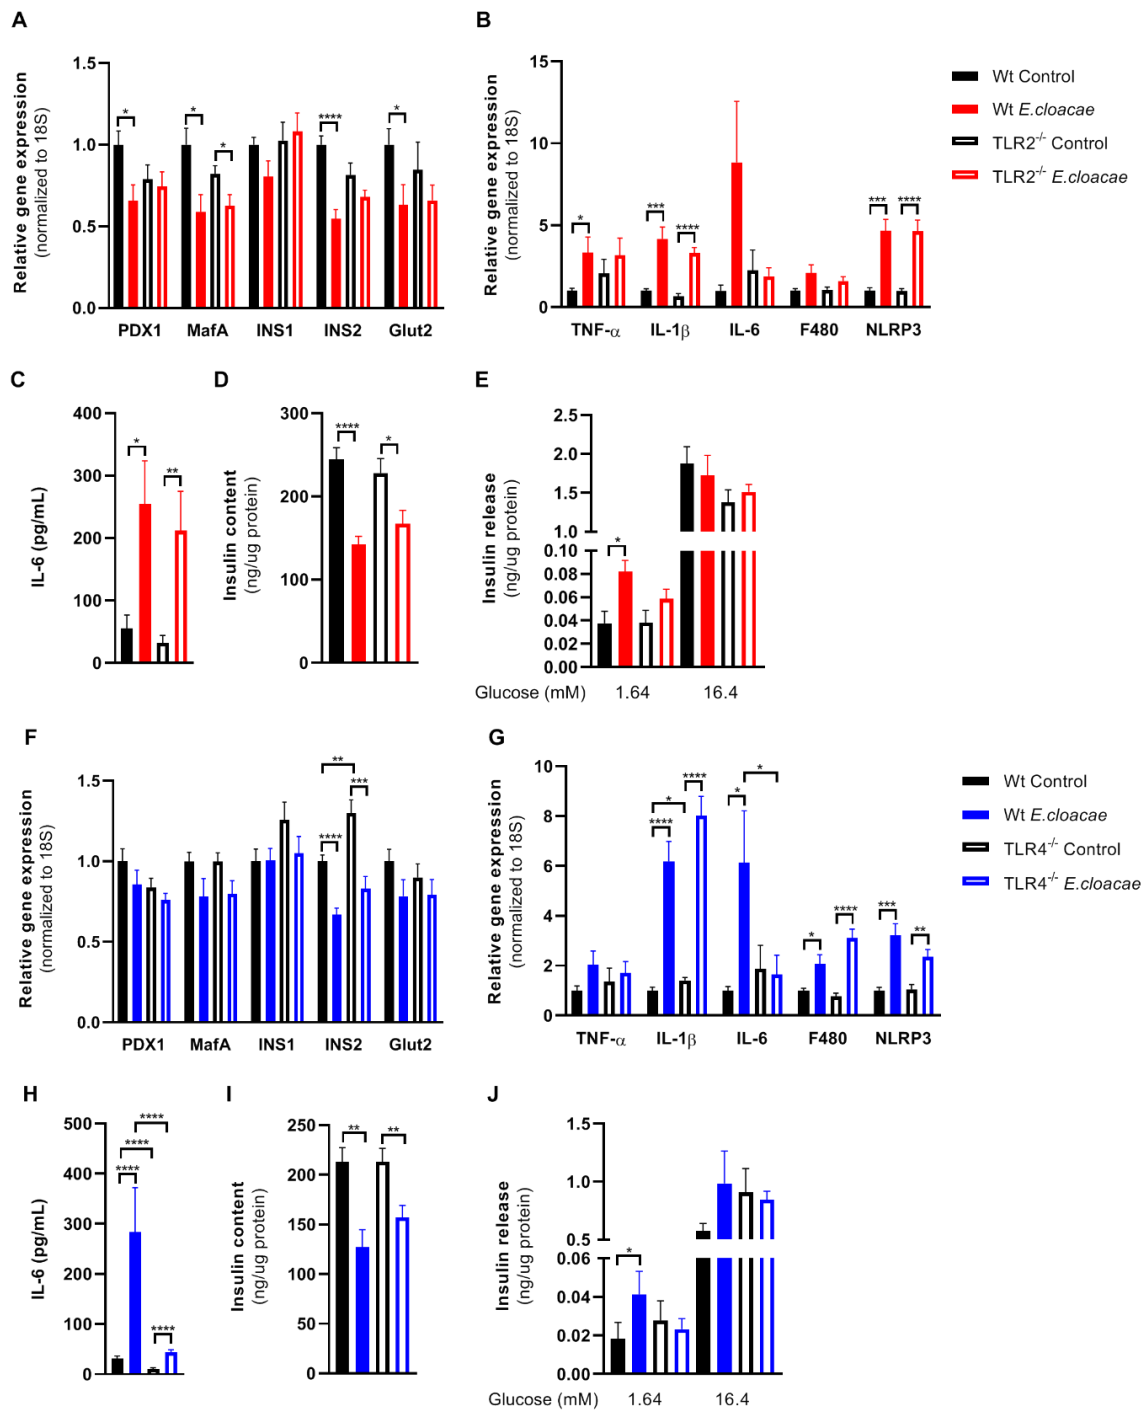

1052

1053 **Figure S3. TLR2 and TLR4 knock out does not protect from beta cell inflammation and**  
 1054 **dysfunction**

1055 Freshly isolated pancreatic islets from C57BL6J TLR2<sup>-/-</sup> (A-E) and TLR4<sup>-/-</sup> (F-J) mice  
 1056 were treated with heat-inactivated *Enterobacter cloacae* (1E6 CFUs/mL) for 72h.

1057 (A) *E. cloacae* reduces expression of beta-cell genes both in wild-type and TLR2 knock  
1058 out pancreatic islets of C57BL6J mice.

1059 (B) *E. cloacae* increases expression of inflammatory genes in wild-type and TLR2  
1060 knock out pancreatic islets of C57BL6J mice.

1061 (C) *E. cloacae* increases secreted IL-6 from by wild-type and TLR2 knock out  
1062 pancreatic islets of C57BL6J mice.

1063 (D) *E. cloacae* reduces insulin content in wild-type and TLR2 knock out pancreatic  
1064 islets of C57BL6J mice.

1065 (E) *E. cloacae* induces insulin hypersecretion in wild-type and TLR2 knock out  
1066 pancreatic islets during low-glucose concentrations of C57BL6J mice.

1067 (F) *E. cloacae* reduces expression of beta-cell genes both in wild-type and TLR4 knock  
1068 out pancreatic islets of C57BL6J mice.

1069 (G) *E. cloacae* increase expression of inflammatory genes in islets in wild-type and  
1070 TLR4 knock out pancreatic islets of C57BL6J mice.

1071 (H) *E. cloacae* increases secreted IL-6 from by wild-type and TLR4 knock out  
1072 pancreatic islets of C57BL6J mice.

1073 (I) *E. cloacae* reduces insulin content in wild-type and TLR4 knock out pancreatic islets  
1074 of C57BL6J mice.

1075 (J) *E. cloacae* induces insulin hypersecretion at low glucose concentrations in wild-  
1076 type and TLR4 knock out pancreatic islets of C57BL6J mice.

1077 Data shown are mean  $\pm$  SEM. Unpaired t-test (A-C, F-H) or Mann-Whitney test (D, E,  
1078 I, J) was used for statistical analysis (mean  $\pm$  SEM, 3 representative experiments per  
1079 panel). Abbreviations: PDX1, pancreatic and duodenal homeobox 1; INS1 and INS2,  
1080 insulin 1 and 2; NLRP3, NACHT, LRR and PYD domains-containing protein 3; TNF- $\alpha$ ,  
1081 tumor necrosis factor-alpha; IL-1 $\beta$ , Interleukin 1 beta; IL-6, Interleukin 6; TLR2, Toll-  
1082 like receptor 2.

1083

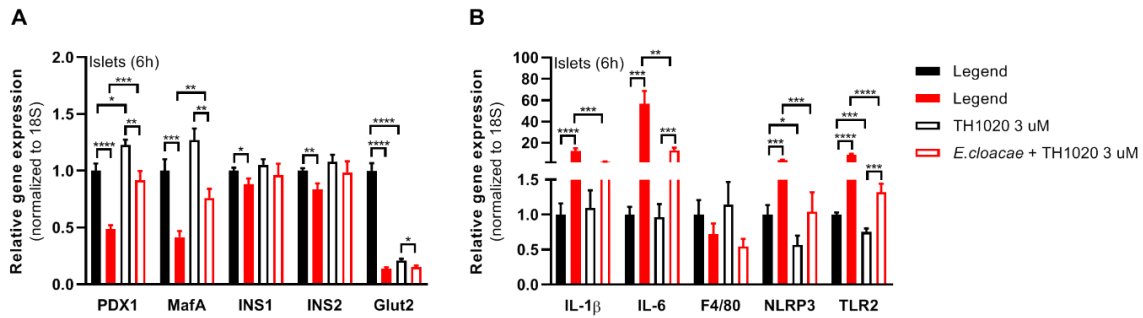

1084

1085 **Figure S4. TLR5 inhibitor reduces bacteria induced beta cell dysfunction.**

1086 Pancreatic islets were isolated from C57BL6J mice and incubated with TLR5 inhibitor  
1087 (3 uM) and *E.cloacae* (1E6 CFUs/mL) for 6h.

1088 (A) TLR5 inhibitor TH1020 reverses bacteria induced pancreatic islet dysfunction.

1089 (B) TLR5 inhibitor TH1020 reduces bacteria induced pancreatic islet inflammation.

1090 Data shown are mean  $\pm$  SEM. Unpaired t-test was used for statistical analysis:

1091 \*p<0.05, \*\*p<0.01, \*\*\*p<0.001, \*\*\*\*p<0.0001.

1092 Abbreviations: INS1 and INS2, insulin 1 and 2; NLRP3, NACHT, LRR and PYD  
1093 domains-containing protein 3; IL-1 $\beta$ , Interleukin 1 beta; IL-6, Interleukin 6; TLR, toll like  
1094 receptor.

1095

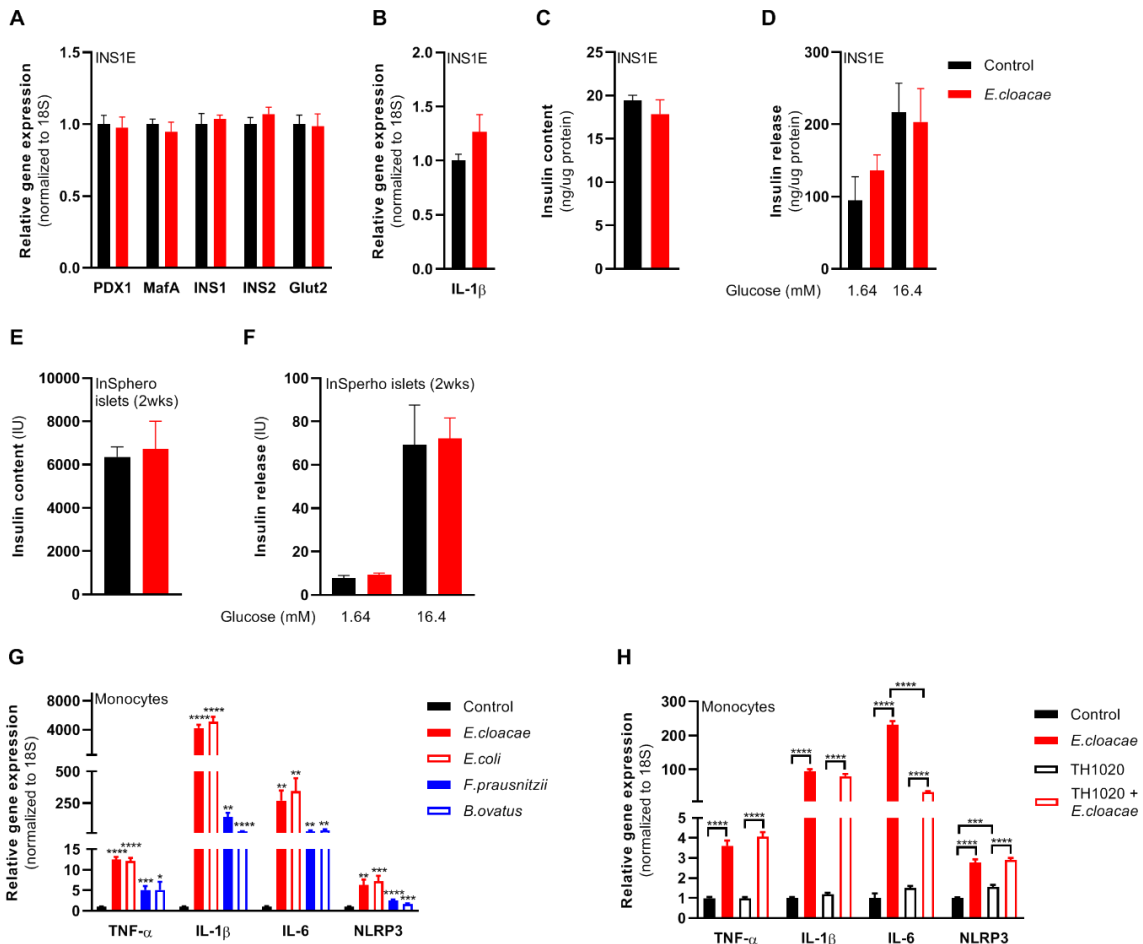

1096

1097 **Figure S5. Pure beta cells do not respond to bacteria, but monocytes.**

1098 Pure beta cells (INS1E, A-D) and modified human islets without immune cells  
 1099 (InSphero islets, E-F) were treated with *E. cloacae* for 72h. Human monocytes were  
 1100 treated with bacteria (1E6 CFUs/mL) or TLR5 inhibitor TH1020 (3 uM) for 24h (G-H).

1101 (A) *E. cloacae* does not reduce beta cell marker expression.

1102 (B) *E. cloacae* does not induce beta cell inflammation.

1103 (C) *E. cloacae* does not reduce insulin content in beta cells.

1104 (D) *E. cloacae* does not induce insulin hypersecretion in beta cells.

1105 (E) *E. cloacae* does not reduce insulin content in InSphero islets.

1106 (F) *E. cloacae* does not induce insulin hypersecretion in InSphero islets.

1107 (G) Opportunistic pathogens induce more inflammation than beneficial bacteria in  
1108 human monocytes.

1109 (H) TLR5 inhibitor TH1020 reduces IL-6 expression in *E.colobacae* treated monocytes..

1110 Data shown are mean  $\pm$  SEM. Unpaired t-test was used for statistical analysis:  
1111 \* $p < 0.05$ , \*\* $p < 0.01$ , \*\*\* $p < 0.001$ , \*\*\*\* $p < 0.0001$ .

1112 Abbreviations: INS1 and INS2, insulin 1 and 2; NLRP3, NACHT, LRR and PYD  
1113 domains-containing protein 3; IL-1 $\beta$ , Interleukin 1 beta; IL-6, Interleukin 6; TLR, toll like  
1114 receptor.

1115

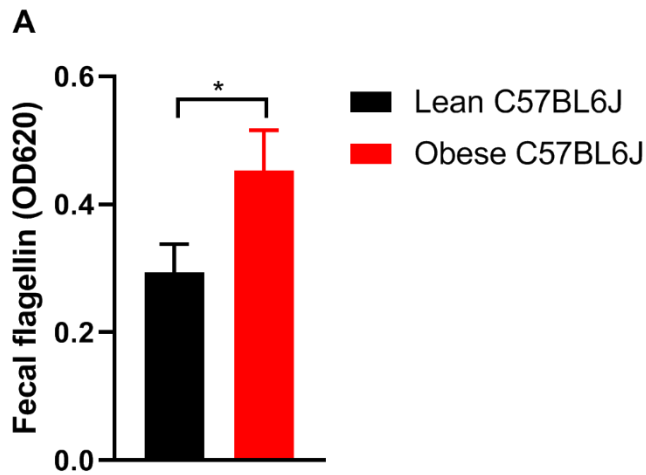

1116

1117 **Figure S6. High fat diet feeding increases fecal flagellin content in mice.**

1118 C57BL6J mice were on a high fat diet (60% kcal fat) for 12 weeks. Fecal flagellin was  
1119 measured in homogenized fecal samples with HEK TLR5 reporter cells.

1120

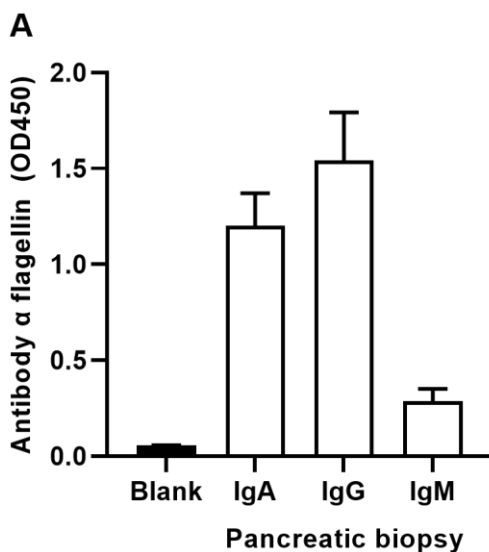

1121

1122 **Figure S7. Human pancreatic biopsies harbor antibodies against bacterial**  
1123 **flagellin.**

1124 Antibodies against flagellin were measured in homogenates of pancreatic biopsies  
1125 from people with T2D undergoing pancreatic surgery.

1126

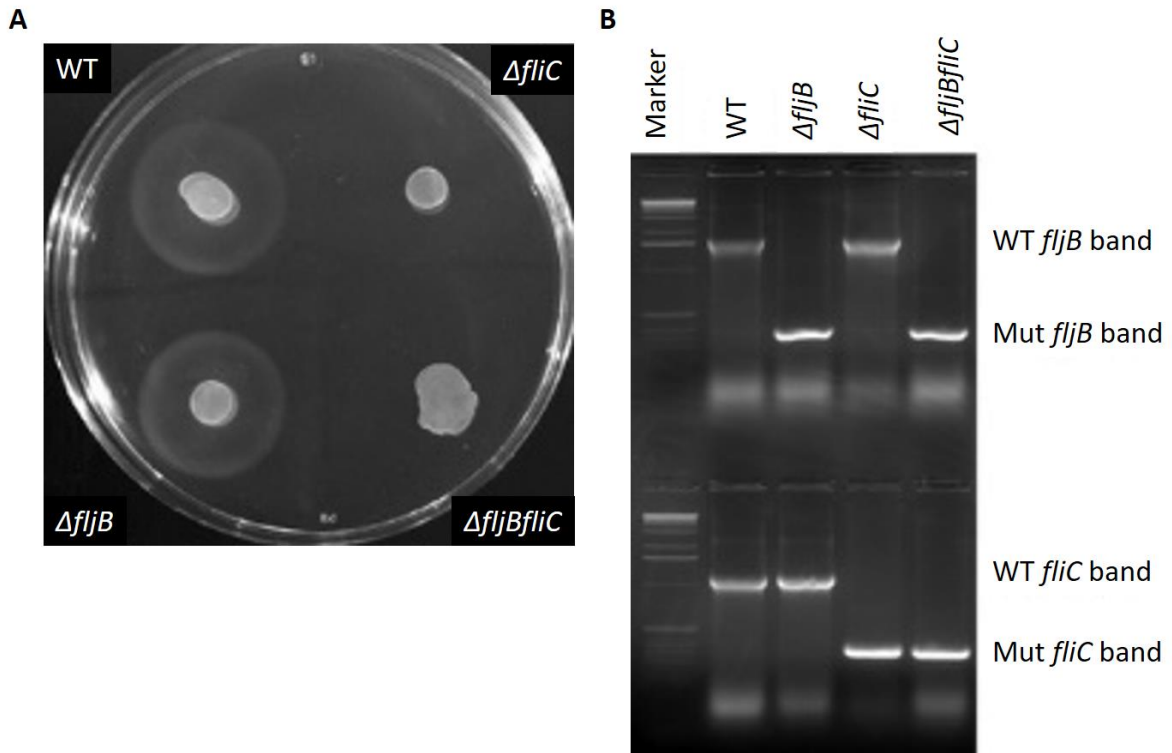

1127

1128 **Figure S8. The flagellin gene was deleted in *Enterobacter cloacae*.**

1129 (A) Motility assay and (B) PCR control showing that *E.cloacae* does not express  
1130 flagella.

1131 **References**

- 1132 Akira, S., and Takeda, K. (2004). Toll-like receptor signalling. *Nat Rev Immunol* **4**,  
1133 499-511.
- 1134 Amar, J., Chabo, C., Waget, A., Klopp, P., Vachoux, C., Bermúdez-Humarán, L.G.,  
1135 Smirnova, N., Bergé, M., Sulpice, T., Lahtinen, S., et al. (2011a). Intestinal mucosal  
1136 adherence and translocation of commensal bacteria at the early onset of type 2  
1137 diabetes: molecular mechanisms and probiotic treatment. *EMBO molecular medicine*  
1138 **3**, 559-572.
- 1139 Amar, J., Serino, M., Lange, C., Chabo, C., Iacovoni, J., Mondot, S., Lepage, P.,  
1140 Klopp, C., Mariette, J., Bouchez, O., et al. (2011b). Involvement of tissue bacteria in  
1141 the onset of diabetes in humans: evidence for a concept. *Diabetologia* **54**, 3055-  
1142 3061.
- 1143 Aykut, B., Pushalkar, S., Chen, R., Li, Q., Abengozar, R., Kim, J.I., Shadaloey, S.A.,  
1144 Wu, D., Preiss, P., Verma, N., et al. (2019). The fungal mycobiome promotes  
1145 pancreatic oncogenesis via activation of MBL. *Nature* **574**, 264-267.
- 1146 Boni-Schnetzler, M., and Meier, D.T. (2019). Islet inflammation in type 2 diabetes.  
1147 *Semin Immunopathol* **41**, 501-513.
- 1148 Bonifield, H.R., and Hughes, K.T. (2003). Flagellar phase variation in *Salmonella*  
1149 *enterica* is mediated by a posttranscriptional control mechanism. *J Bacteriol* **185**,  
1150 3567-3574.
- 1151 Brereton, M.F., Iberl, M., Shimomura, K., Zhang, Q., Adriaenssens, A.E., Proks, P.,  
1152 Spiliotis, I., Dace, W., Mattis, K.K., Ramracheya, R., et al. (2014). Reversible  
1153 changes in pancreatic islet structure and function produced by elevated blood  
1154 glucose. *Nat Commun* **5**, 4639.
- 1155 Brissova, M., and Powers, A.C. (2008). Revascularization of transplanted islets: can  
1156 it be improved? *Diabetes* **57**, 2269-2271.
- 1157 Cantley, J., and Ashcroft, F.M. (2015). Q&A: insulin secretion and type 2 diabetes:  
1158 why do  $\beta$ -cells fail? *BMC Biol* **13**, 33-33.
- 1159 Costea, P.I., Zeller, G., Sunagawa, S., Pelletier, E., Alberti, A., Levenez, F.,  
1160 Tramontano, M., Driessen, M., Hercog, R., Jung, F.-E., et al. (2017). Towards  
1161 standards for human fecal sample processing in metagenomic studies. *Nature*  
1162 *Biotechnology* **35**, 1069-1076.
- 1163 Cullender, T.C., Chassaing, B., Janzon, A., Kumar, K., Muller, C.E., Werner, J.J.,  
1164 Angenent, L.T., Bell, M.E., Hay, A.G., Peterson, D.A., et al. (2013a). Innate and  
1165 adaptive immunity interact to quench microbiome flagellar motility in the gut. *Cell*  
1166 *Host Microbe* **14**, 571-581.



- 1167 Cullender, T.C., Chassaing, B., Janzon, A., Kumar, K., Muller, C.E., Werner, J.J.,  
1168 Angenent, L.T., Bell, M.E., Hay, A.G., Peterson, D.A., et al. (2013b). Innate and  
1169 adaptive immunity interact to quench microbiome flagellar motility in the gut. *Cell*  
1170 *Host Microbe* *14*, 571-581.
- 1171 de Goffau, M.C., Lager, S., Sovio, U., Gaccioli, F., Cook, E., Peacock, S.J., Parkhill,  
1172 J., Charnock-Jones, D.S., and Smith, G.C.S. (2019). Human placenta has no  
1173 microbiome but can contain potential pathogens. *Nature* *572*, 329-334.
- 1174 De Maayer, P., and Cowan, D.A. (2016). Flashy flagella: flagellin modification is  
1175 relatively common and highly versatile among the Enterobacteriaceae. *BMC*  
1176 *Genomics* *17*, 377-377.
- 1177 Defronzo, R.A. (2009). Banting Lecture. From the triumvirate to the ominous octet: a  
1178 new paradigm for the treatment of type 2 diabetes mellitus. *Diabetes* *58*, 773-795.
- 1179 Dehoux, P., Marvaud, J.C., Abouelleil, A., Earl, A.M., Lambert, T., and Dauga, C.  
1180 (2016). Comparative genomics of *Clostridium bolteae* and *Clostridium clostridioforme*  
1181 reveals species-specific genomic properties and numerous putative antibiotic  
1182 resistance determinants. *BMC Genomics* *17*, 819.
- 1183 Deschasaux, M., Bouter, K.E., Prodan, A., Levin, E., Groen, A.K., Herrema, H.,  
1184 Tremaroli, V., Bakker, G.J., Attaye, I., Pinto-Sietsma, S.J., et al. (2018). Depicting the  
1185 composition of gut microbiota in a population with varied ethnic origins but shared  
1186 geography. *Nat Med* *24*, 1526-1531.
- 1187 Donath, M.Y., Böni-Schnetzler, M., Ellingsgaard, H., and Ehse, J.A. (2009). Islet  
1188 inflammation impairs the pancreatic beta-cell in type 2 diabetes. *Physiology*  
1189 (Bethesda) *24*, 325-331.
- 1190 Donath, M.Y., and Shoelson, S.E. (2011). Type 2 diabetes as an inflammatory  
1191 disease. *Nat Rev Immunol* *11*, 98-107.
- 1192 Ehse, J.A., Perren, A., Eppler, E., Ribaux, P., Pospisilik, J.A., Maor-Cahn, R.,  
1193 Gueripel, X., Ellingsgaard, H., Schneider, M.K., Biollaz, G., et al. (2007). Increased  
1194 number of islet-associated macrophages in type 2 diabetes. *Diabetes* *56*, 2356-2370.
- 1195 Ellingsgaard, H., Hauselmann, I., Schuler, B., Habib, A.M., Baggio, L.L., Meier, D.T.,  
1196 Eppler, E., Bouzakri, K., Wueest, S., Muller, Y.D., et al. (2011). Interleukin-6  
1197 enhances insulin secretion by increasing glucagon-like peptide-1 secretion from L  
1198 cells and alpha cells. *Nat Med* *17*, 1481-1489.
- 1199 Erion, K., and Corkey, B.E. (2018).  $\beta$ -Cell Failure or  $\beta$ -Cell Abuse? *Front Endocrinol*  
1200 (Lausanne) *9*, 532.

- 1201 Esser, N., Utzschneider, K.M., and Kahn, S.E. (2020). Early beta cell dysfunction vs  
1202 insulin hypersecretion as the primary event in the pathogenesis of dysglycaemia.  
1203 *Diabetologia* 63, 2007-2021.
- 1204 Fei, N., and Zhao, L. (2013). An opportunistic pathogen isolated from the gut of an  
1205 obese human causes obesity in germfree mice. *ISME J* 7, 880-884.
- 1206 Gewirtz, A.T., Simon, P.O., Jr., Schmitt, C.K., Taylor, L.J., Hagedorn, C.H., O'Brien,  
1207 A.D., Neish, A.S., and Madara, J.L. (2001). Salmonella typhimurium translocates  
1208 flagellin across intestinal epithelia, inducing a proinflammatory response. *J Clin*  
1209 *Invest* 107, 99-109.
- 1210 Ghoshal, S., Witta, J., Zhong, J., de Villiers, W., and Eckhardt, E. (2009).  
1211 Chylomicrons promote intestinal absorption of lipopolysaccharides. *J Lipid Res* 50,  
1212 90-97.
- 1213 Giarratana, N., Penna, G., Amuchastegui, S., Mariani, R., Daniel, K.C., and Adorini,  
1214 L. (2004). A Vitamin D Analog Down-Regulates Proinflammatory Chemokine  
1215 Production by Pancreatic Islets Inhibiting T Cell Recruitment and Type 1 Diabetes  
1216 Development. *The Journal of Immunology* 173, 2280.
- 1217 Gomes, J.M.G., Costa, J.A., and Alfenas, R.C.G. (2017). Metabolic endotoxemia and  
1218 diabetes mellitus: A systematic review. *Metabolism* 68, 133-144.
- 1219 Gurung, M., Li, Z., You, H., Rodrigues, R., Jump, D.B., Morgun, A., and Shulzhenko,  
1220 N. (2020). Role of gut microbiota in type 2 diabetes pathophysiology. *EBioMedicine*  
1221 51, 102590-102590.
- 1222 Haiko, J., and Westerlund-Wikström, B. (2013). The role of the bacterial flagellum in  
1223 adhesion and virulence. *Biology (Basel)* 2, 1242-1267.
- 1224 Hajmrlc, C., Smith, N., Spigelman, A.F., Dai, X., Senior, L., Bautista, A., Ferdaoussi,  
1225 M., and MacDonald, P.E. (2016). Interleukin-1 signaling contributes to acute islet  
1226 compensation. *JCI Insight* 1, e86055.
- 1227 Hasnain, S.Z., Borg, D.J., Harcourt, B.E., Tong, H., Sheng, Y.H., Ng, C.P., Das, I.,  
1228 Wang, R., Chen, A.C.H., Loudovaris, T., et al. (2014). Glycemic control in diabetes is  
1229 restored by therapeutic manipulation of cytokines that regulate beta cell stress.  
1230 *Nature Medicine* 20, 1417-1426.
- 1231 Henquin, J.-C. (2019). The challenge of correctly reporting hormones content and  
1232 secretion in isolated human islets. *Molecular Metabolism* 30, 230-239.
- 1233 Herrema, H., and Niess, J.H. (2020). Intestinal microbial metabolites in human  
1234 metabolism and type 2 diabetes. *Diabetologia* 63, 2533-2547.

- 1235 Ho, S.N., Hunt, H.D., Horton, R.M., Pullen, J.K., and Pease, L.R. (1989). Site-  
1236 directed mutagenesis by overlap extension using the polymerase chain reaction.  
1237 *Gene* 77, 51-59.
- 1238 Hug, H., Mohajeri, M.H., and La Fata, G. (2018). Toll-Like Receptors: Regulators of  
1239 the Immune Response in the Human Gut. *Nutrients* 10, 203.
- 1240 Igoillo-Esteve, M., Marselli, L., Cunha, D.A., Ladrière, L., Ortis, F., Grieco, F.A.,  
1241 Dotta, F., Weir, G.C., Marchetti, P., Eizirik, D.L., et al. (2010). Palmitate induces a  
1242 pro-inflammatory response in human pancreatic islets that mimics CCL2 expression  
1243 by beta cells in type 2 diabetes. *Diabetologia* 53, 1395-1405.
- 1244 Iyer, S.S., Pulskens, W.P., Sadler, J.J., Butter, L.M., Teske, G.J., Ulland, T.K.,  
1245 Eisenbarth, S.C., Florquin, S., Flavell, R.A., Leemans, J.C., et al. (2009). Necrotic  
1246 cells trigger a sterile inflammatory response through the Nlrp3 inflammasome. *Proc*  
1247 *Natl Acad Sci U S A* 106, 20388-20393.
- 1248 Ji, Y., Sun, S., Shrestha, N., Darragh, L.B., Shirakawa, J., Xing, Y., He, Y.,  
1249 Carboneau, B.A., Kim, H., An, D., et al. (2019). Toll-like receptors TLR2 and TLR4  
1250 block the replication of pancreatic  $\beta$  cells in diet-induced obesity. *Nature Immunology*  
1251 20, 677-686.
- 1252 Johnson, J.D. (2021). On the causal relationships between hyperinsulinaemia, insulin  
1253 resistance, obesity and dysglycaemia in type 2 diabetes. *Diabetologia* 64, 2138-  
1254 2146.
- 1255 Kajikawa, A., Midorikawa, E., Masuda, K., Kondo, K., Irisawa, T., Igimi, S., and  
1256 Okada, S. (2016). Characterization of flagellins isolated from a highly motile strain of  
1257 *Lactobacillus agilis*. *BMC Microbiol* 16, 49.
- 1258 Keskitalo, A., Munukka, E., Toivonen, R., Hollmen, M., Kainulainen, H., Huovinen, P.,  
1259 Jalkanen, S., and Pekkala, S. (2018). Enterobacter cloacae administration induces  
1260 hepatic damage and subcutaneous fat accumulation in high-fat diet fed mice. *PLoS*  
1261 *One* 13, e0198262.
- 1262 Kootte, R.S., Levin, E., Salojarvi, J., Smits, L.P., Hartstra, A.V., Udayappan, S.D.,  
1263 Hermes, G., Bouter, K.E., Koopen, A.M., Holst, J.J., et al. (2017). Improvement of  
1264 Insulin Sensitivity after Lean Donor Feces in Metabolic Syndrome Is Driven by  
1265 Baseline Intestinal Microbiota Composition. *Cell Metab* 26, 611-619 e616.
- 1266 Kozich, J.J., Westcott, S.L., Baxter, N.T., Highlander, S.K., and Schloss, P.D. (2013).  
1267 Development of a dual-index sequencing strategy and curation pipeline for analyzing  
1268 amplicon sequence data on the MiSeq Illumina sequencing platform. *Appl Environ*  
1269 *Microbiol* 79, 5112-5120.

- 1270 Le Chatelier, E., Nielsen, T., Qin, J., Prifti, E., Hildebrand, F., Falony, G., Almeida,  
1271 M., Arumugam, M., Batto, J.M., Kennedy, S., et al. (2013). Richness of human gut  
1272 microbiome correlates with metabolic markers. *Nature* 500, 541-546.
- 1273 Maedler, K., Spinas, G.A., Lehmann, R., Sergeev, P., Weber, M., Fontana, A.,  
1274 Kaiser, N., and Donath, M.Y. (2001). Glucose induces beta-cell apoptosis via  
1275 upregulation of the Fas receptor in human islets. *Diabetes* 50, 1683-1690.
- 1276 Marchetti, P. (2016). Islet inflammation in type 2 diabetes. *Diabetologia* 59, 668-672.
- 1277 Massier, L., Chakaroun, R., Tabei, S., Crane, A., Ditt, K.D., Fallmann, J., von  
1278 Bergen, M., Haange, S.-B., Heyne, H., Stumvoll, M., et al. (2020). Adipose tissue  
1279 derived bacteria are associated with inflammation in obesity and type 2 diabetes. *Gut*  
1280 69, 1796.
- 1281 Matsuda, K., Tsuji, H., Asahara, T., Kado, Y., and Nomoto, K. (2007). Sensitive  
1282 quantitative detection of commensal bacteria by rRNA-targeted reverse transcription-  
1283 PCR. *Appl Environ Microbiol* 73, 32-39.
- 1284 Mehran, A.E., Templeman, N.M., Brigidi, G.S., Lim, G.E., Chu, K.Y., Hu, X., Botezelli,  
1285 J.D., Asadi, A., Hoffman, B.G., Kieffer, T.J., et al. (2012). Hyperinsulinemia drives  
1286 diet-induced obesity independently of brain insulin production. *Cell Metab* 16, 723-  
1287 737.
- 1288 MM, O.D., Harris, H.M., Lynch, D.B., Ross, R.P., and O'Toole, P.W. (2015).  
1289 *Lactobacillus ruminis* strains cluster according to their mammalian gut source. *BMC*  
1290 *Microbiol* 15, 80.
- 1291 Nackiewicz, D., Dan, M., He, W., Kim, R., Salmi, A., Rützi, S., Westwell-Roper, C.,  
1292 Cunningham, A., Speck, M., Schuster-Klein, C., et al. (2014). TLR2/6 and TLR4-  
1293 activated macrophages contribute to islet inflammation and impair beta cell insulin  
1294 gene expression via IL-1 and IL-6. *Diabetologia* 57, 1645-1654.
- 1295 Nackiewicz, D., Dan, M., Speck, M., Chow, S.Z., Chen, Y.-C., Pospisilik, J.A.,  
1296 Verchere, C.B., and Ehses, J.A. (2020). Islet Macrophages Shift to a Reparative  
1297 State following Pancreatic Beta-Cell Death and Are a Major Source of Islet Insulin-  
1298 like Growth Factor-1. *iScience* 23, 100775.
- 1299 Nadkarni, M.A., Martin, F.E., Jacques, N.A., and Hunter, N. (2002). Determination of  
1300 bacterial load by real-time PCR using a broad-range (universal) probe and primers  
1301 set. *Microbiology (Reading)* 148, 257-266.
- 1302 Ouchi, N., Parker, J.L., Lugus, J.J., and Walsh, K. (2011). Adipokines in inflammation  
1303 and metabolic disease. *Nat Rev Immunol* 11, 85-97.

- 1304 Pories, W.J., and Dohm, G.L. (2012). Diabetes: have we got it all wrong?  
1305 Hyperinsulinism as the culprit: surgery provides the evidence. *Diabetes Care* 35,  
1306 2438-2442.
- 1307 Qin, J., Li, Y., Cai, Z., Li, S., Zhu, J., Zhang, F., Liang, S., Zhang, W., Guan, Y.,  
1308 Shen, D., et al. (2012). A metagenome-wide association study of gut microbiota in  
1309 type 2 diabetes. *Nature* 490, 55-60.
- 1310 Rahier, J., Guiot, Y., Goebbels, R.M., Sempoux, C., and Henquin, J.C. (2008).  
1311 Pancreatic  $\beta$ -cell mass in European subjects with type 2 diabetes. *Diabetes, Obesity*  
1312 *and Metabolism* 10, 32-42.
- 1313 Riquelme, E., Zhang, Y., Zhang, L., Montiel, M., Zoltan, M., Dong, W., Quesada, P.,  
1314 Sahin, I., Chandra, V., San Lucas, A., et al. (2019). Tumor Microbiome Diversity and  
1315 Composition Influence Pancreatic Cancer Outcomes. *Cell* 178, 795-806.e712.
- 1316 Rogers, M.B., Aveson, V., Firek, B., Yeh, A., Brooks, B., Brower-Sinning, R., Steve,  
1317 J., Banfield, J.F., Zureikat, A., Hogg, M., et al. (2017). Disturbances of the  
1318 Perioperative Microbiome Across Multiple Body Sites in Patients Undergoing  
1319 Pancreaticoduodenectomy. *Pancreas* 46, 260-267.
- 1320 Rosengren, A.H., Braun, M., Mahdi, T., Andersson, S.A., Travers, M.E., Shigeto, M.,  
1321 Zhang, E., Almgren, P., Ladenvall, C., Axelsson, A.S., et al. (2012). Reduced insulin  
1322 exocytosis in human pancreatic  $\beta$ -cells with gene variants linked to type 2 diabetes.  
1323 *Diabetes* 61, 1726-1733.
- 1324 Scheithauer, T.P.M., Bakker, G.J., Winkelmeijer, M., Davids, M., Nieuwdorp, M., van  
1325 Raalte, D.H., and Herrema, H. (2021). Compensatory intestinal immunoglobulin  
1326 response after vancomycin treatment in humans. *Gut Microbes* 13, 1-14.
- 1327 Scheithauer, T.P.M., Rampanelli, E., Nieuwdorp, M., Vallance, B.A., Verchere, C.B.,  
1328 van Raalte, D.H., and Herrema, H. (2020). Gut Microbiota as a Trigger for Metabolic  
1329 Inflammation in Obesity and Type 2 Diabetes. *Frontiers in Immunology* 11.
- 1330 Snijder, M.B., Galenkamp, H., Prins, M., Derks, E.M., Peters, R.J.G., Zwinderman,  
1331 A.H., and Stronks, K. (2017). Cohort profile: the Healthy Life in an Urban Setting  
1332 (HELIUS) study in Amsterdam, The Netherlands. *BMJ Open* 7, e017873.
- 1333 Staimez, L.R., Weber, M.B., Ranjani, H., Ali, M.K., Echouffo-Tcheugui, J.B., Phillips,  
1334 L.S., Mohan, V., and Narayan, K.M.V. (2013). Evidence of Reduced  $\beta$ -Cell Function  
1335 in Asian Indians With Mild Dysglycemia. *Diabetes Care* 36, 2772-2778.
- 1336 Takeuchi, O., Hoshino, K., Kawai, T., Sanjo, H., Takada, H., Ogawa, T., Takeda, K.,  
1337 and Akira, S. (1999). Differential Roles of TLR2 and TLR4 in Recognition of Gram-  
1338 Negative and Gram-Positive Bacterial Cell Wall Components. *Immunity* 11, 443-451.

- 1339 Tamanai-Shacoori, Z., Smida, I., Bousarghin, L., Loreal, O., Meuric, V., Fong, S.B.,  
1340 Bonnaure-Mallet, M., and Jolivet-Gougeon, A. (2017). Roseburia spp.: a marker of  
1341 health? *Future Microbiol* 12, 157-170.
- 1342 Templeman, N.M., Clee, S.M., and Johnson, J.D. (2015). Suppression of  
1343 hyperinsulinaemia in growing female mice provides long-term protection against  
1344 obesity. *Diabetologia* 58, 2392-2402.
- 1345 Templeman, N.M., Flibotte, S., Chik, J.H.L., Sinha, S., Lim, G.E., Foster, L.J., Nislow,  
1346 C., and Johnson, J.D. (2017). Reduced Circulating Insulin Enhances Insulin  
1347 Sensitivity in Old Mice and Extends Lifespan. *Cell Rep* 20, 451-463.
- 1348 Thomas, R.M., and Jobin, C. (2020). Microbiota in pancreatic health and disease: the  
1349 next frontier in microbiome research. *Nature Reviews Gastroenterology &*  
1350 *Hepatology* 17, 53-64.
- 1351 Ting, S.Y., Martínez-García, E., Huang, S., Bertolli, S.K., Kelly, K.A., Cutler, K.J., Su,  
1352 E.D., Zhi, H., Tang, Q., Radey, M.C., et al. (2020). Targeted Depletion of Bacteria  
1353 from Mixed Populations by Programmable Adhesion with Antagonistic Competitor  
1354 Cells. *Cell Host Microbe* 28, 313-321.e316.
- 1355 Tran, H.Q., Ley, R.E., Gewirtz, A.T., and Chassaing, B. (2019). Flagellin-elicited  
1356 adaptive immunity suppresses flagellated microbiota and vaccinates against chronic  
1357 inflammatory diseases. *Nature Communications* 10, 5650.
- 1358 Tricò, D., Natali, A., Arslanian, S., Mari, A., and Ferrannini, E. (2018). Identification,  
1359 pathophysiology, and clinical implications of primary insulin hypersecretion in  
1360 nondiabetic adults and adolescents. *JCI Insight* 3.
- 1361 Udayappan, S.D., Kovatcheva-Datchary, P., Bakker, G.J., Havik, S.R., Herrema, H.,  
1362 Cani, P.D., Bouter, K.E., Belzer, C., Witjes, J.J., Vrieze, A., et al. (2017). Intestinal  
1363 *Ralstonia pickettii* augments glucose intolerance in obesity. *PLOS ONE* 12,  
1364 e0181693.
- 1365 Van Olden, C.C., Van de Laar, A.W., Meijnikman, A.S., Aydin, O., Van Olst, N.,  
1366 Hoozemans, J.B., De Brauw, L.M., Bruin, S.C., Acherman, Y.I.Z., Verheij, J., et al.  
1367 (2021). A systems biology approach to understand gut microbiota and host  
1368 metabolism in morbid obesity: design of the BARIA Longitudinal Cohort Study. *J*  
1369 *Intern Med* 289, 340-354.
- 1370 van Raalte, D.H., and Verchere, C.B. (2017). Improving glycaemic control in type 2  
1371 diabetes: Stimulate insulin secretion or provide beta-cell rest? *Diabetes Obes Metab*  
1372 19, 1205-1213.
- 1373 Vijay-Kumar, M., and Gewirtz, A.T. (2009). Flagellin: key target of mucosal innate  
1374 immunity. *Mucosal Immunol* 2, 197-205.

- 1375 Wen, L., Peng, J., Li, Z., and Wong, F.S. (2004). The effect of innate immunity on  
1376 autoimmune diabetes and the expression of Toll-like receptors on pancreatic islets. *J*  
1377 *Immunol* *172*, 3173-3180.
- 1378 Westwell-Roper, C.Y., Ehse, J.A., and Verchere, C.B. (2014). Resident  
1379 macrophages mediate islet amyloid polypeptide-induced islet IL-1 $\beta$  production and  $\beta$ -  
1380 cell dysfunction. *Diabetes* *63*, 1698-1711.
- 1381 Weyer, C., Bogardus, C., Mott, D.M., and Pratley, R.E. (1999). The natural history of  
1382 insulin secretory dysfunction and insulin resistance in the pathogenesis of type 2  
1383 diabetes mellitus. *J Clin Invest* *104*, 787-794.
- 1384 Weyer, C., Funahashi, T., Tanaka, S., Hotta, K., Matsuzawa, Y., Pratley, R.E., and  
1385 Tataranni, P.A. (2001). Hypoadiponectinemia in Obesity and Type 2 Diabetes: Close  
1386 Association with Insulin Resistance and Hyperinsulinemia. *The Journal of Clinical*  
1387 *Endocrinology & Metabolism* *86*, 1930-1935.
- 1388 Weyer, C., Hanson, R.L., Tataranni, P.A., Bogardus, C., and Pratley, R.E. (2000). A  
1389 high fasting plasma insulin concentration predicts type 2 diabetes independent of  
1390 insulin resistance: evidence for a pathogenic role of relative hyperinsulinemia.  
1391 *Diabetes* *49*, 2094-2101.
- 1392 Ying, W., Fu, W., Lee, Y.S., and Olefsky, J.M. (2020). The role of macrophages in  
1393 obesity-associated islet inflammation and  $\beta$ -cell abnormalities. *Nature Reviews*  
1394 *Endocrinology* *16*, 81-90.
- 1395 Ying, W., Lee, Y.S., Dong, Y., Seidman, J.S., Yang, M., Isaac, R., Seo, J.B., Yang,  
1396 B.H., Wollam, J., Riopel, M., et al. (2019). Expansion of Islet-Resident Macrophages  
1397 Leads to Inflammation Affecting  $\beta$  Cell Proliferation and Function in Obesity. *Cell*  
1398 *Metab* *29*, 457-474.e455.
- 1399 Yoon, S.-i., Kurnasov, O., Natarajan, V., Hong, M., Gudkov, A.V., Osterman, A.L.,  
1400 and Wilson, I.A. (2012). Structural basis of TLR5-flagellin recognition and signaling.  
1401 *Science* *335*, 859-864.
- 1402 Zhang, M., Chekan, J.R., Dodd, D., Hong, P.-Y., Radlinski, L., Revindran, V., Nair,  
1403 S.K., Mackie, R.I., and Cann, I. (2014). Xylan utilization in human gut commensal  
1404 bacteria is orchestrated by unique modular organization of polysaccharide-degrading  
1405 enzymes. *Proceedings of the National Academy of Sciences* *111*, E3708-E3717.  
1406
